# Supplementary material for: DFT and AFIR study on the copper(i)-catalyzed mechanism of 5-enamine-trisubstituted-1,2,3-triazole synthesis via C–N cross-coupling and the origin of ring-opening of 2H-azirines
Source: Royal Society of Chemistry journal article supplement (doi:10.1039/d0ra07498e), 2021-01-01
Supplement: d0ra07498e1.pdf [file d0ra07498e1.pdf]

## Supplementary information

### **DFT and AFIR Study on the Copper (I)-Catalyzed Mechanism of 5-Enamine-Trisubstituted-1, 2, 3-Triazole Synthesis via C-N Cross-Coupling and the Origin of Ring-Opening of 2*H*-Azirines**

Fan Yu, Zhaoman Zhou, Jiajia Song, Yanying Zhao\*

Department of Chemistry and State Key Laboratory of Advanced Textiles Materials and Manufacture Technology, Ministry of Education, Zhejiang Sci-Tech University, Hangzhou 310018, China.

Corresponding Author: E-mail: [yyzhao@zstu.edu.cn](mailto:yyzhao@zstu.edu.cn)

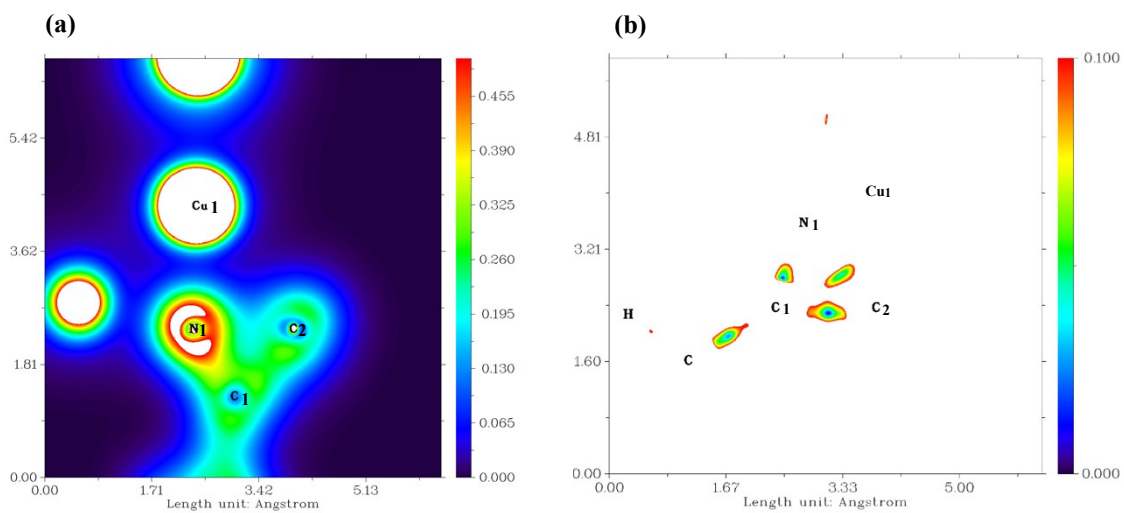

**Figure S1.** (a)

Color-filled plots of the valence electron density and (b) reduced density gradient (RDG) on the C1-C2-Cu1 plane for P2-3s.

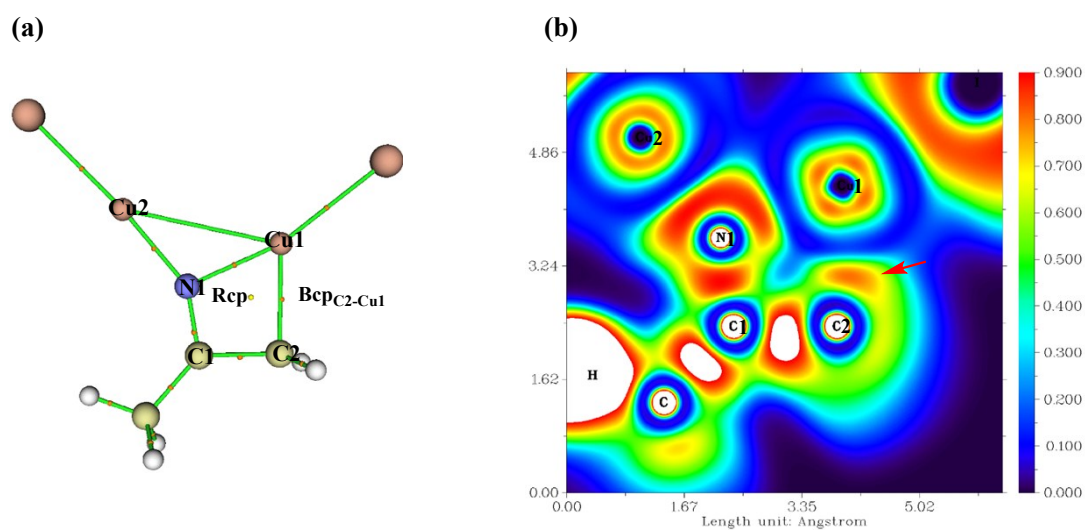

**Figure S2.** (a) The molecular graph of P2-3s with AIM analysis. (b) Color-filled map of electron localization function (ELF) for P2-3s.

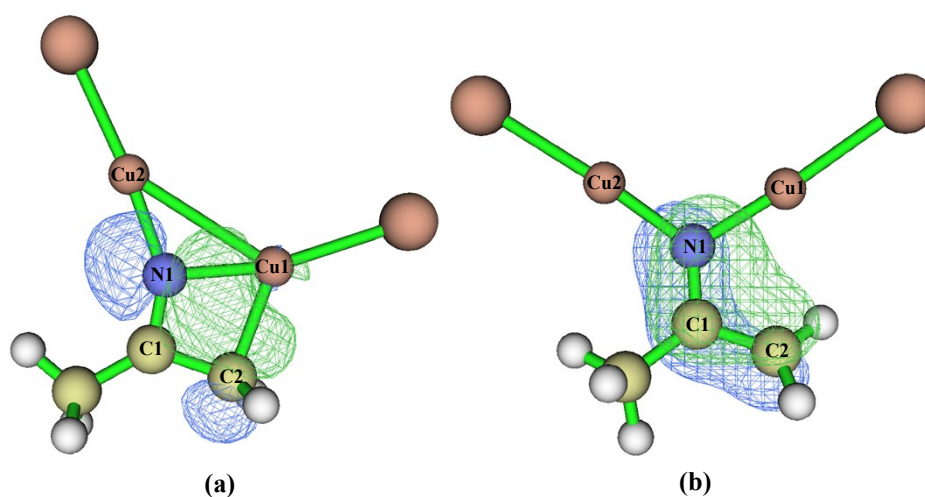

**Figure S3.** Map of localized molecular orbital (LMO) of (a) P2-TS2s and (b) P2-3s

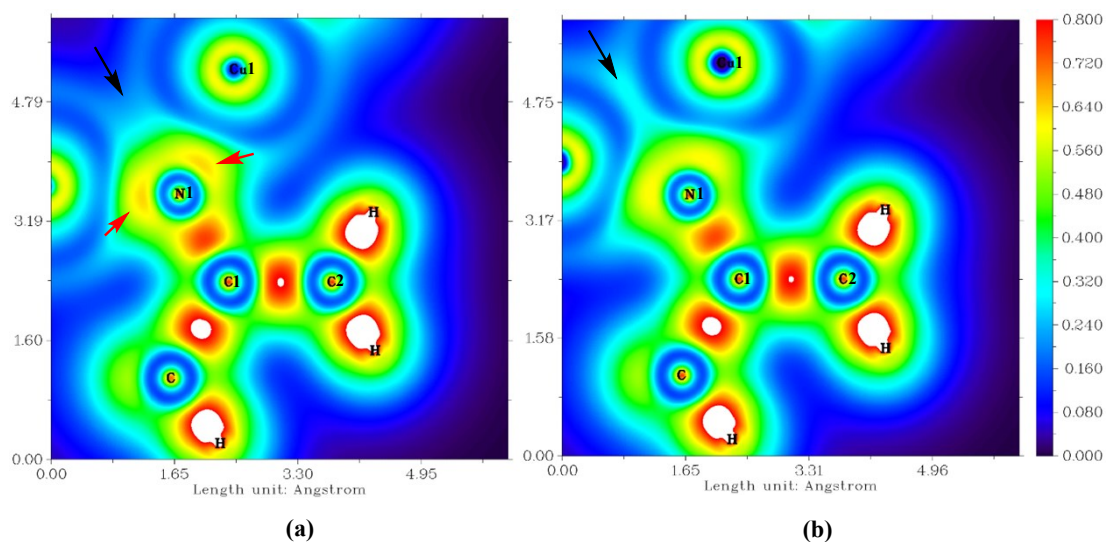

**Figure S4.** Color-filled map of localized orbital locator (LOL) for (a) P2-4s and (b) P2-4t on the C1-C2-N1 plane. The region where electron density higher than the upper limit of color scale is depicted as white.

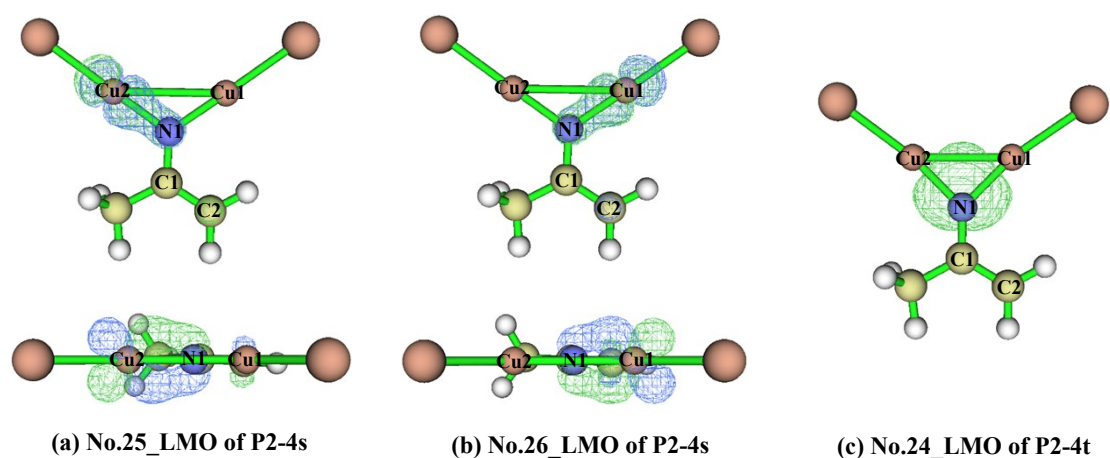

**Figure S5.** Map of localized molecular orbital (LMO) of P2-4s and P2-4t

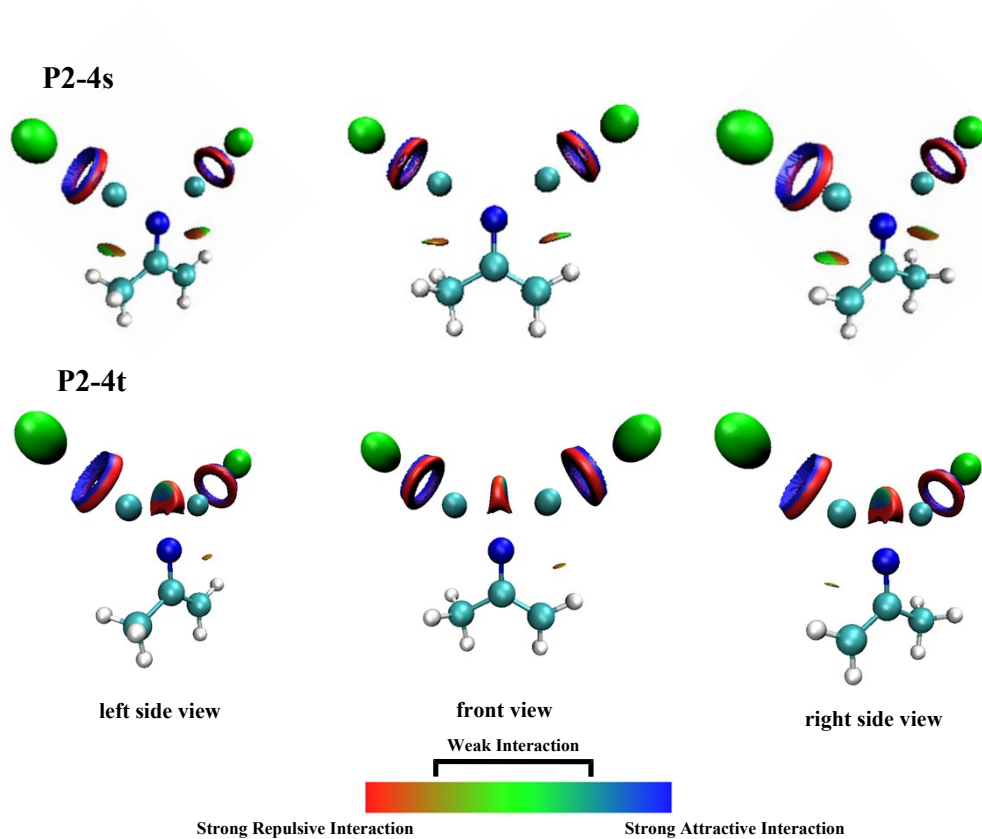

**Figure S6.** Gradient Isosurfaces ( $s = 0.5$  a.u.) of P2-4s and P2-4t. The surfaces are colored on a blue-green-red scale according to values of  $\text{sign}(\lambda_2)\rho$ , ranging from -0.04 to +0.02 a.u.. Blue indicates strong attractive interactions, and red indicates strong non-bonded overlap.

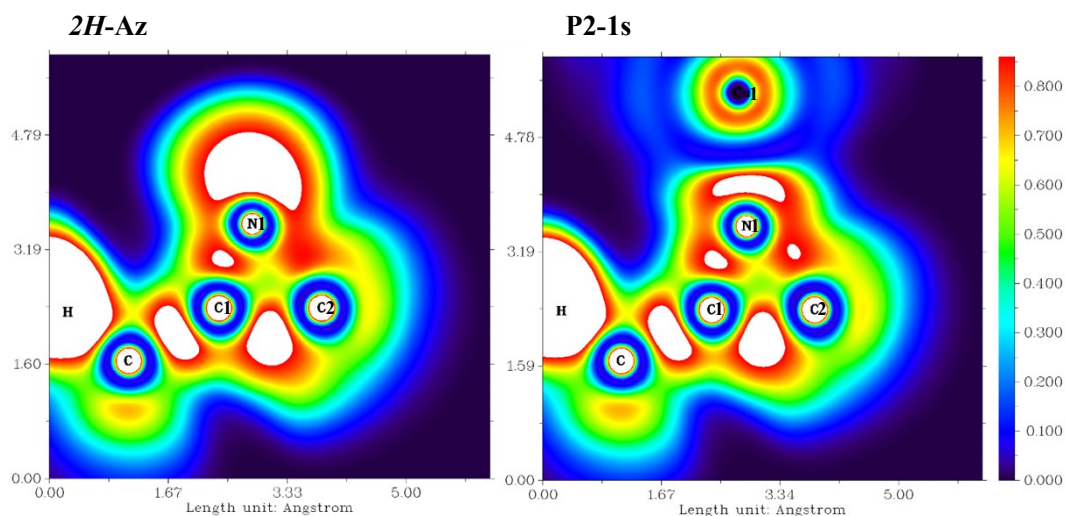

**Figure S7.** Color-filled map of electron localization function (ELF) for (a) *2H-Az* and (b) *P2-1s* on the C1-C2-N1 plane. The region where electron density higher than the upper limit of color scale is depicted as white.

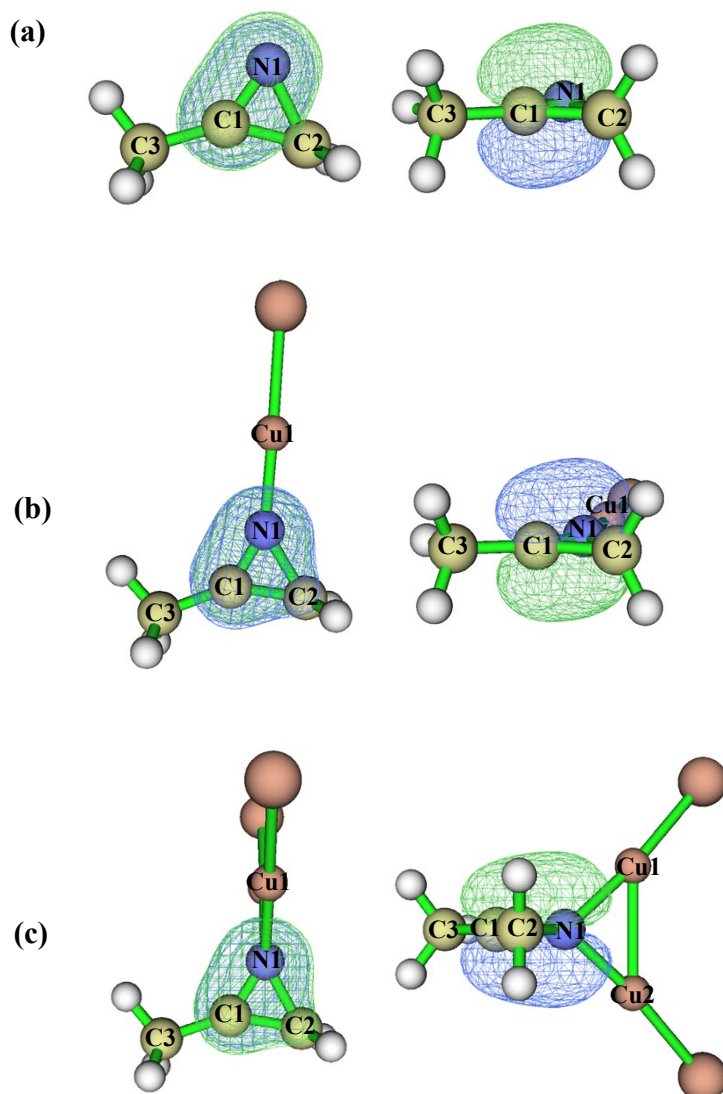

**Figure S8.** Ring  $\pi$  bond plotted by AdNDP (a) *2H-Az* (b) *P2-1s* and (c) *P2-2s*.

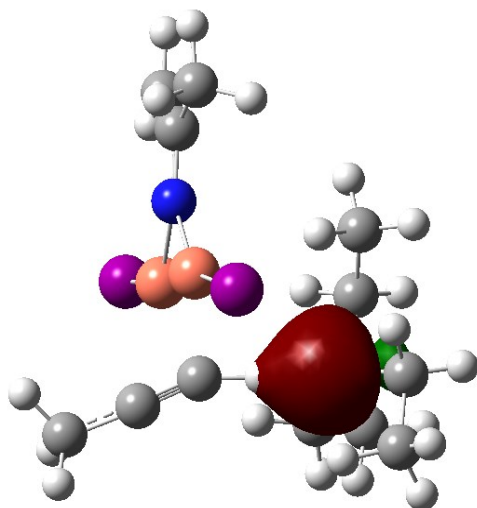

**Figure S9.** Highest occupied molecular orbital (HOMO) of P2-6t.

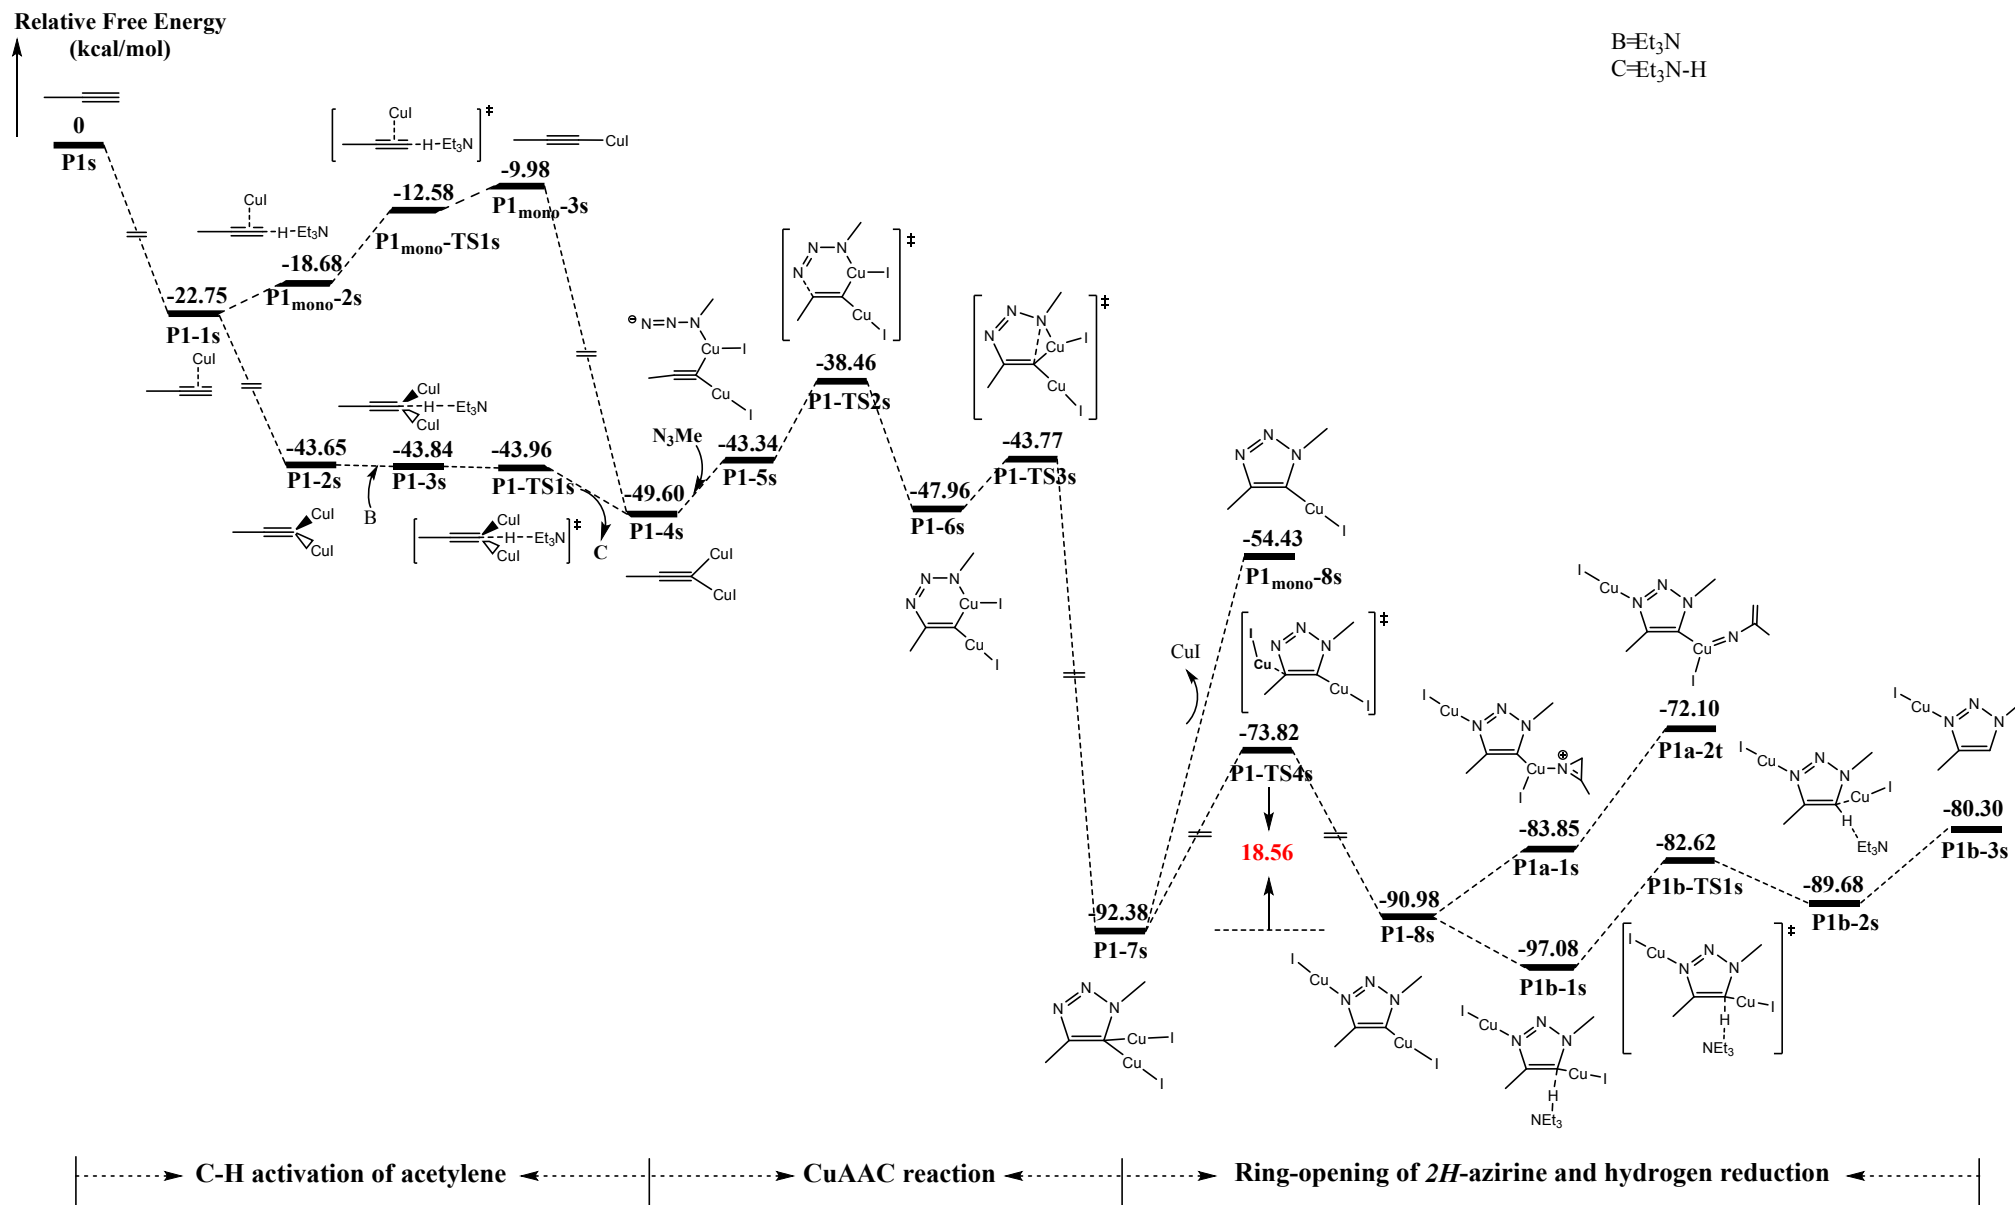

Figure S10. The potential energy surface profiles for the 5-“Interrupted” click reaction (named as Path 1).

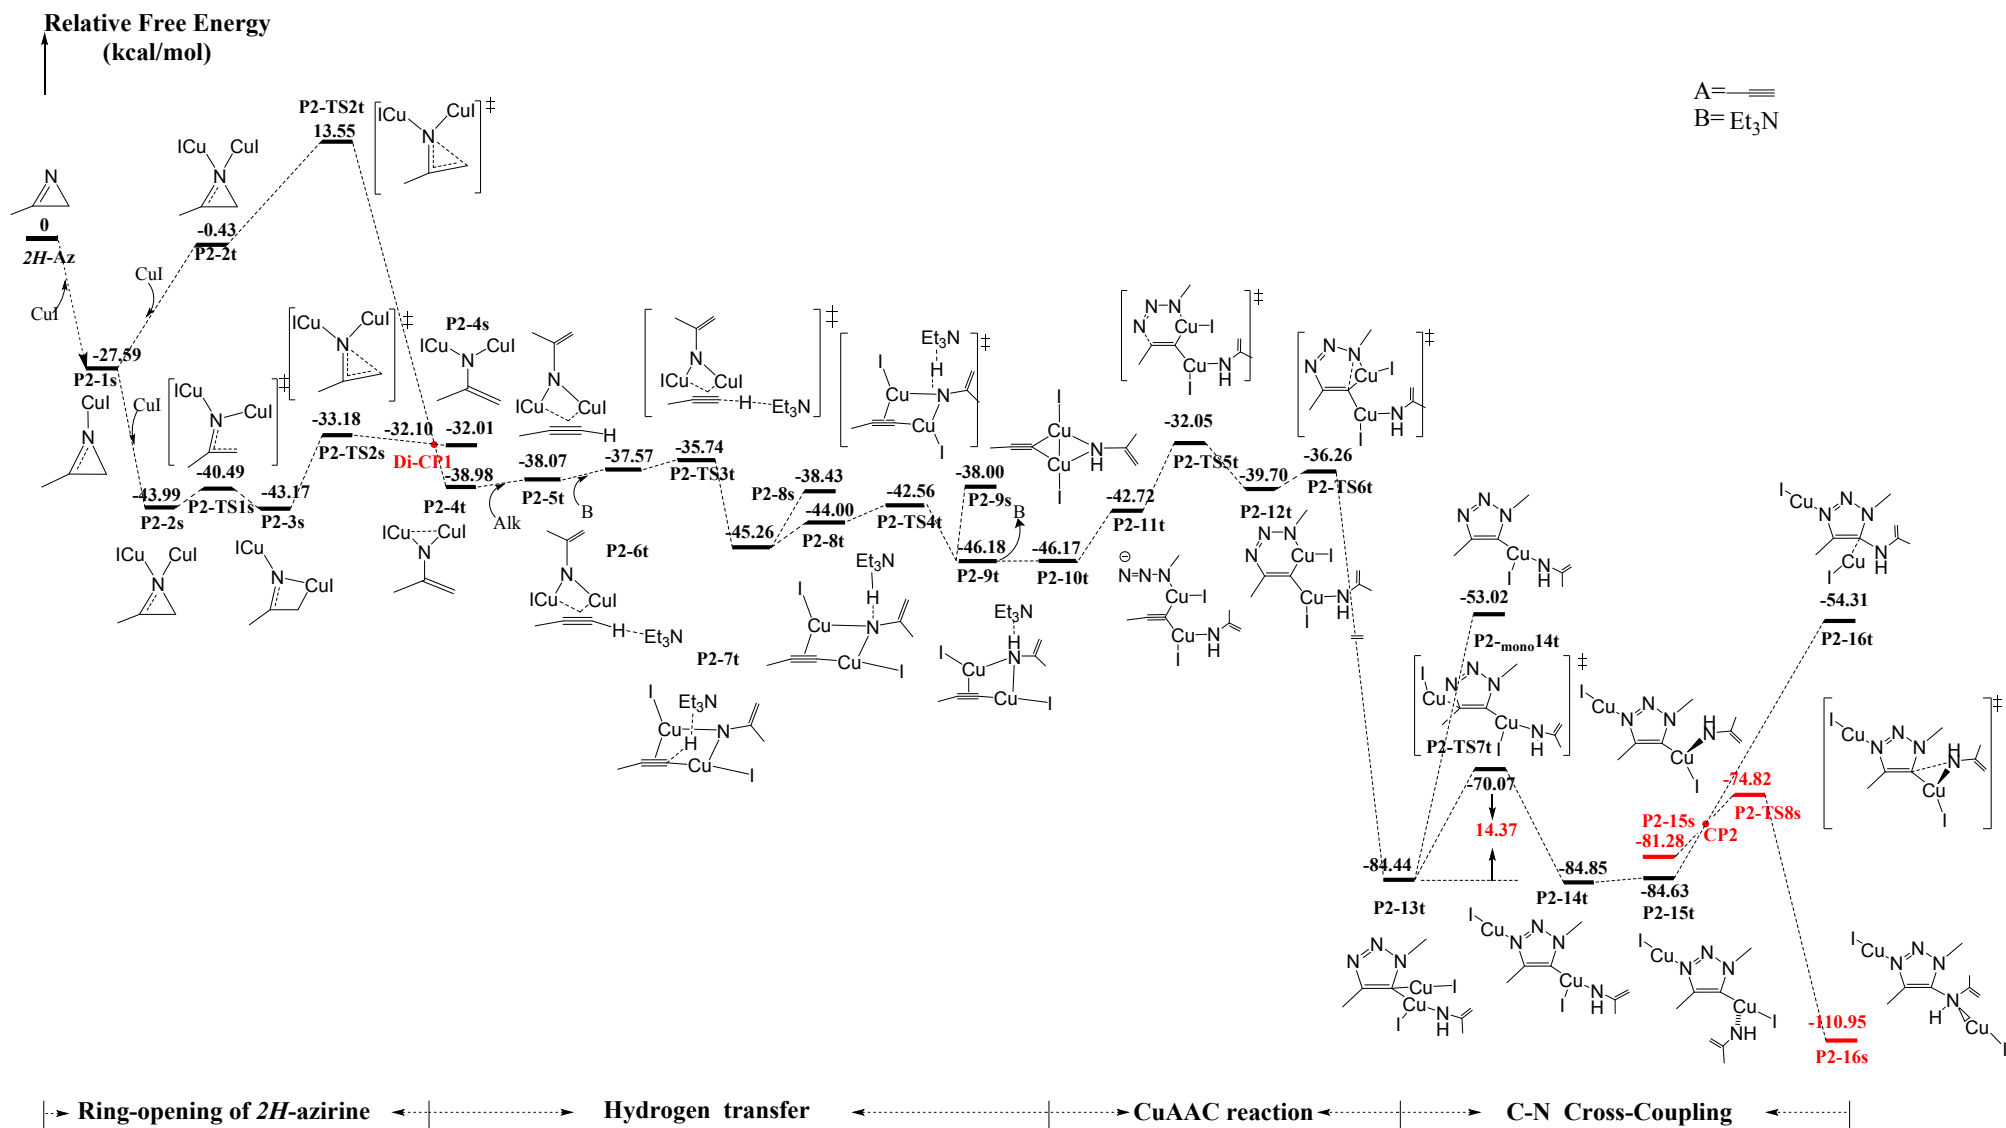

Figure S11. Total potential energy surface profiles discussed in the text (named as Path 2).



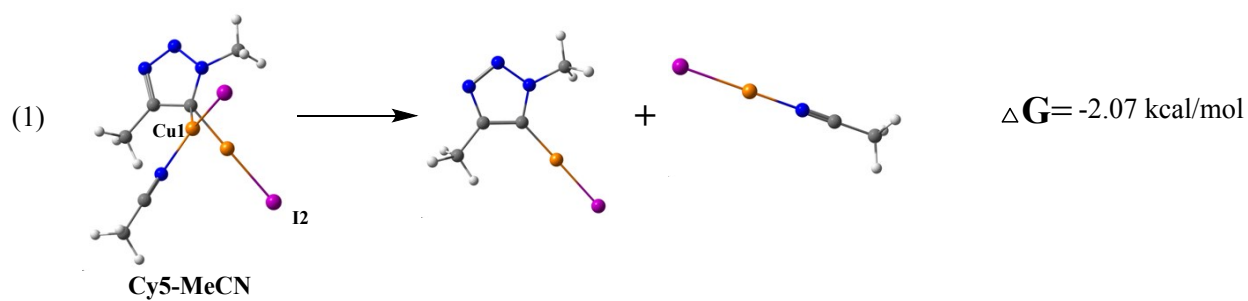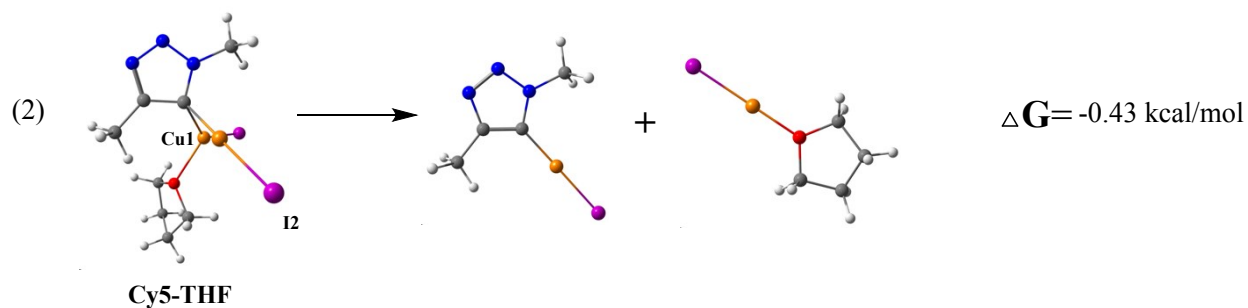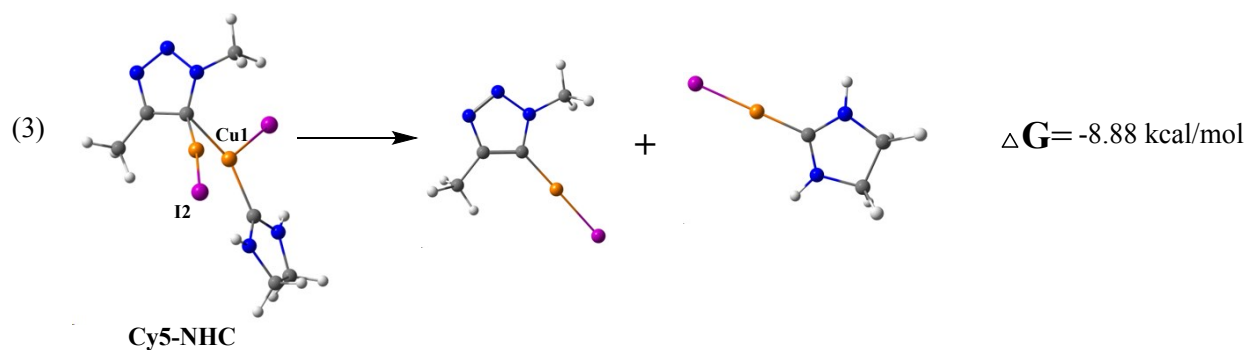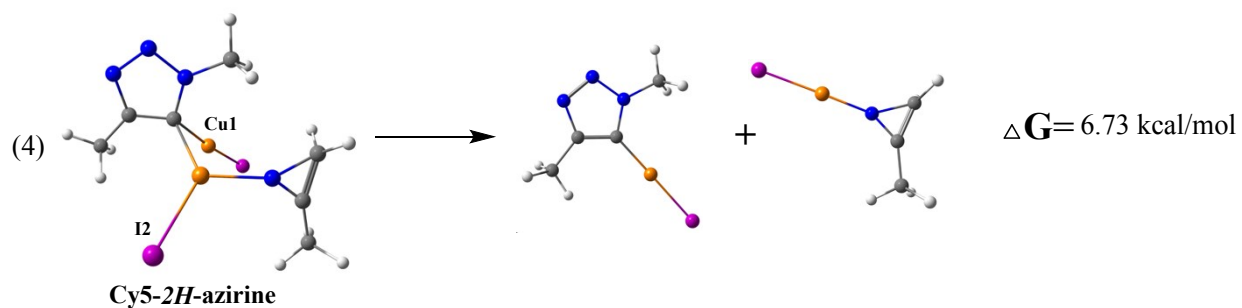

**Figure S12.** Calculated free Gibbs energies (kcal/mol) for (1) Cy5-MeCN, (2) Cy5-THF, (3) Cy5-NHC and (4) Cy5-2*H*-azirine chemical reactions from dicopper to monocopper 1,2,3-triazole.



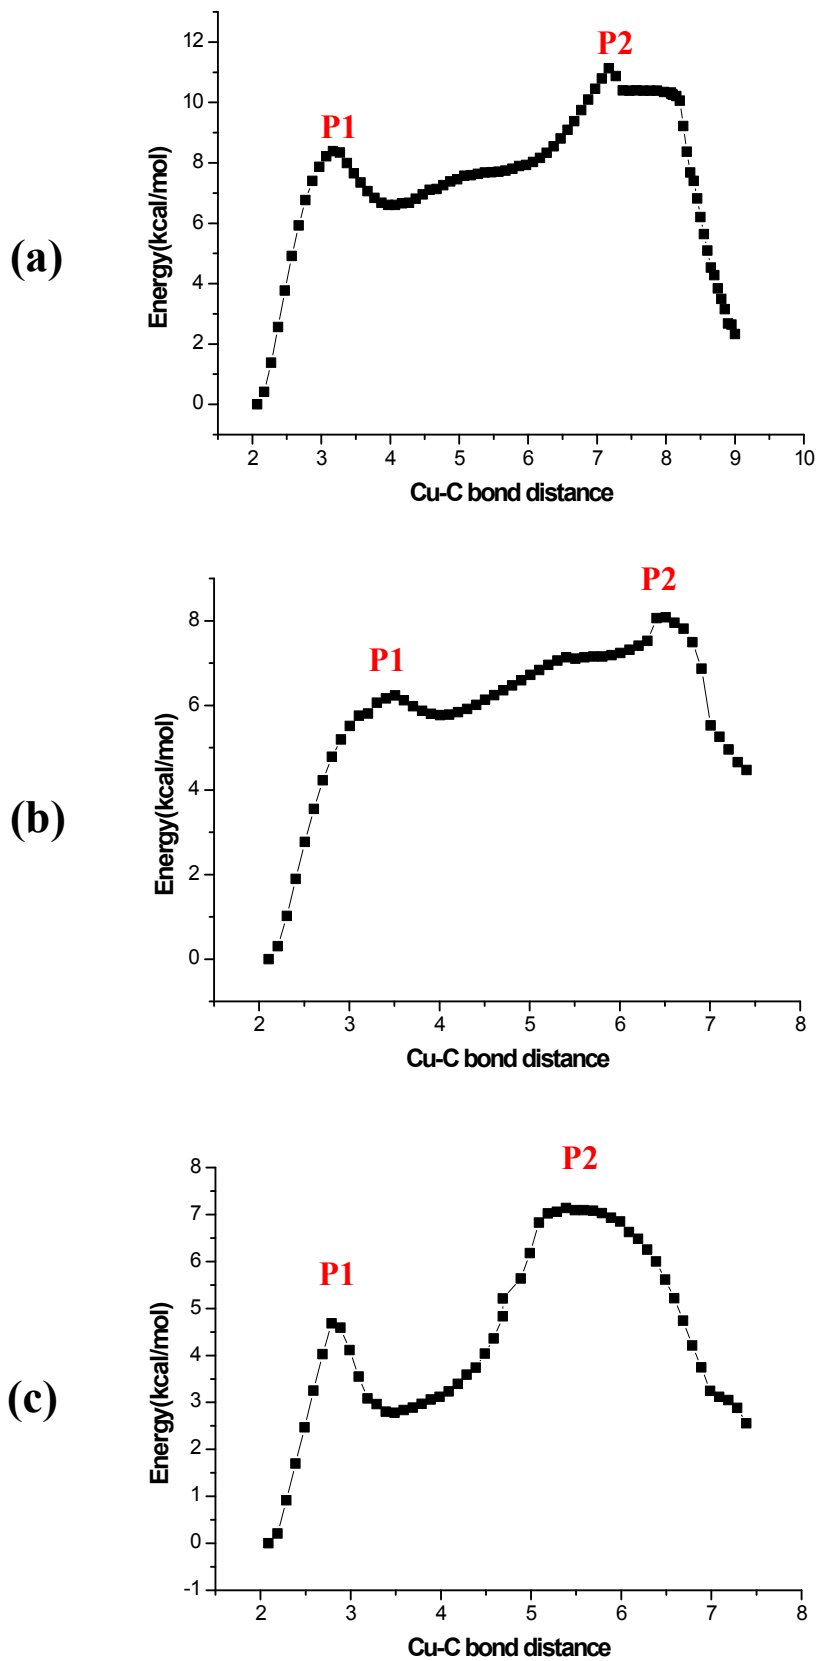

**Figure S13.** Potential energy scan along the Cu-C bond distances ( $\text{\AA}$ ) with the step size  $0.1 \text{ \AA}$  for (a) Cy5-MeCN, (b) Cy5-THF and (b) Cy5-NHC.

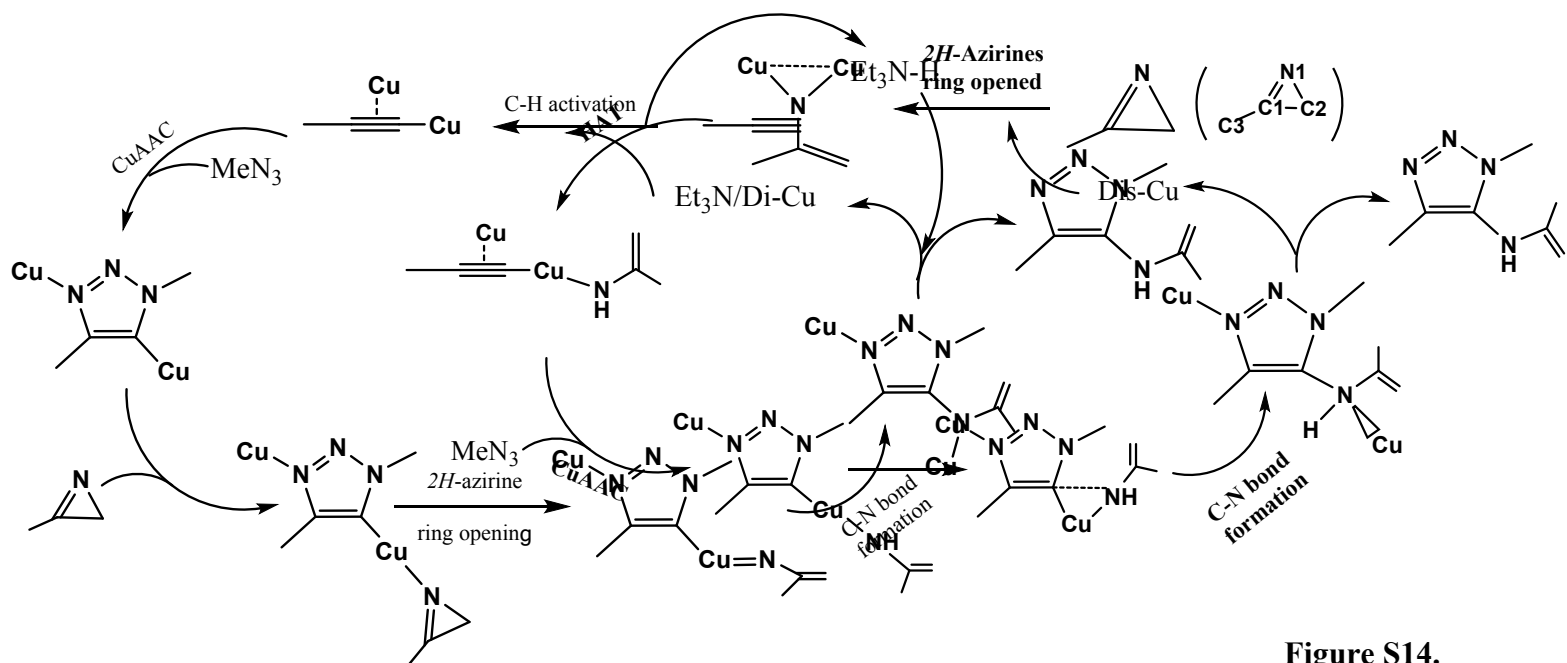

Detailed reaction processes by dicopper(I) catalyst.

Figure S14.

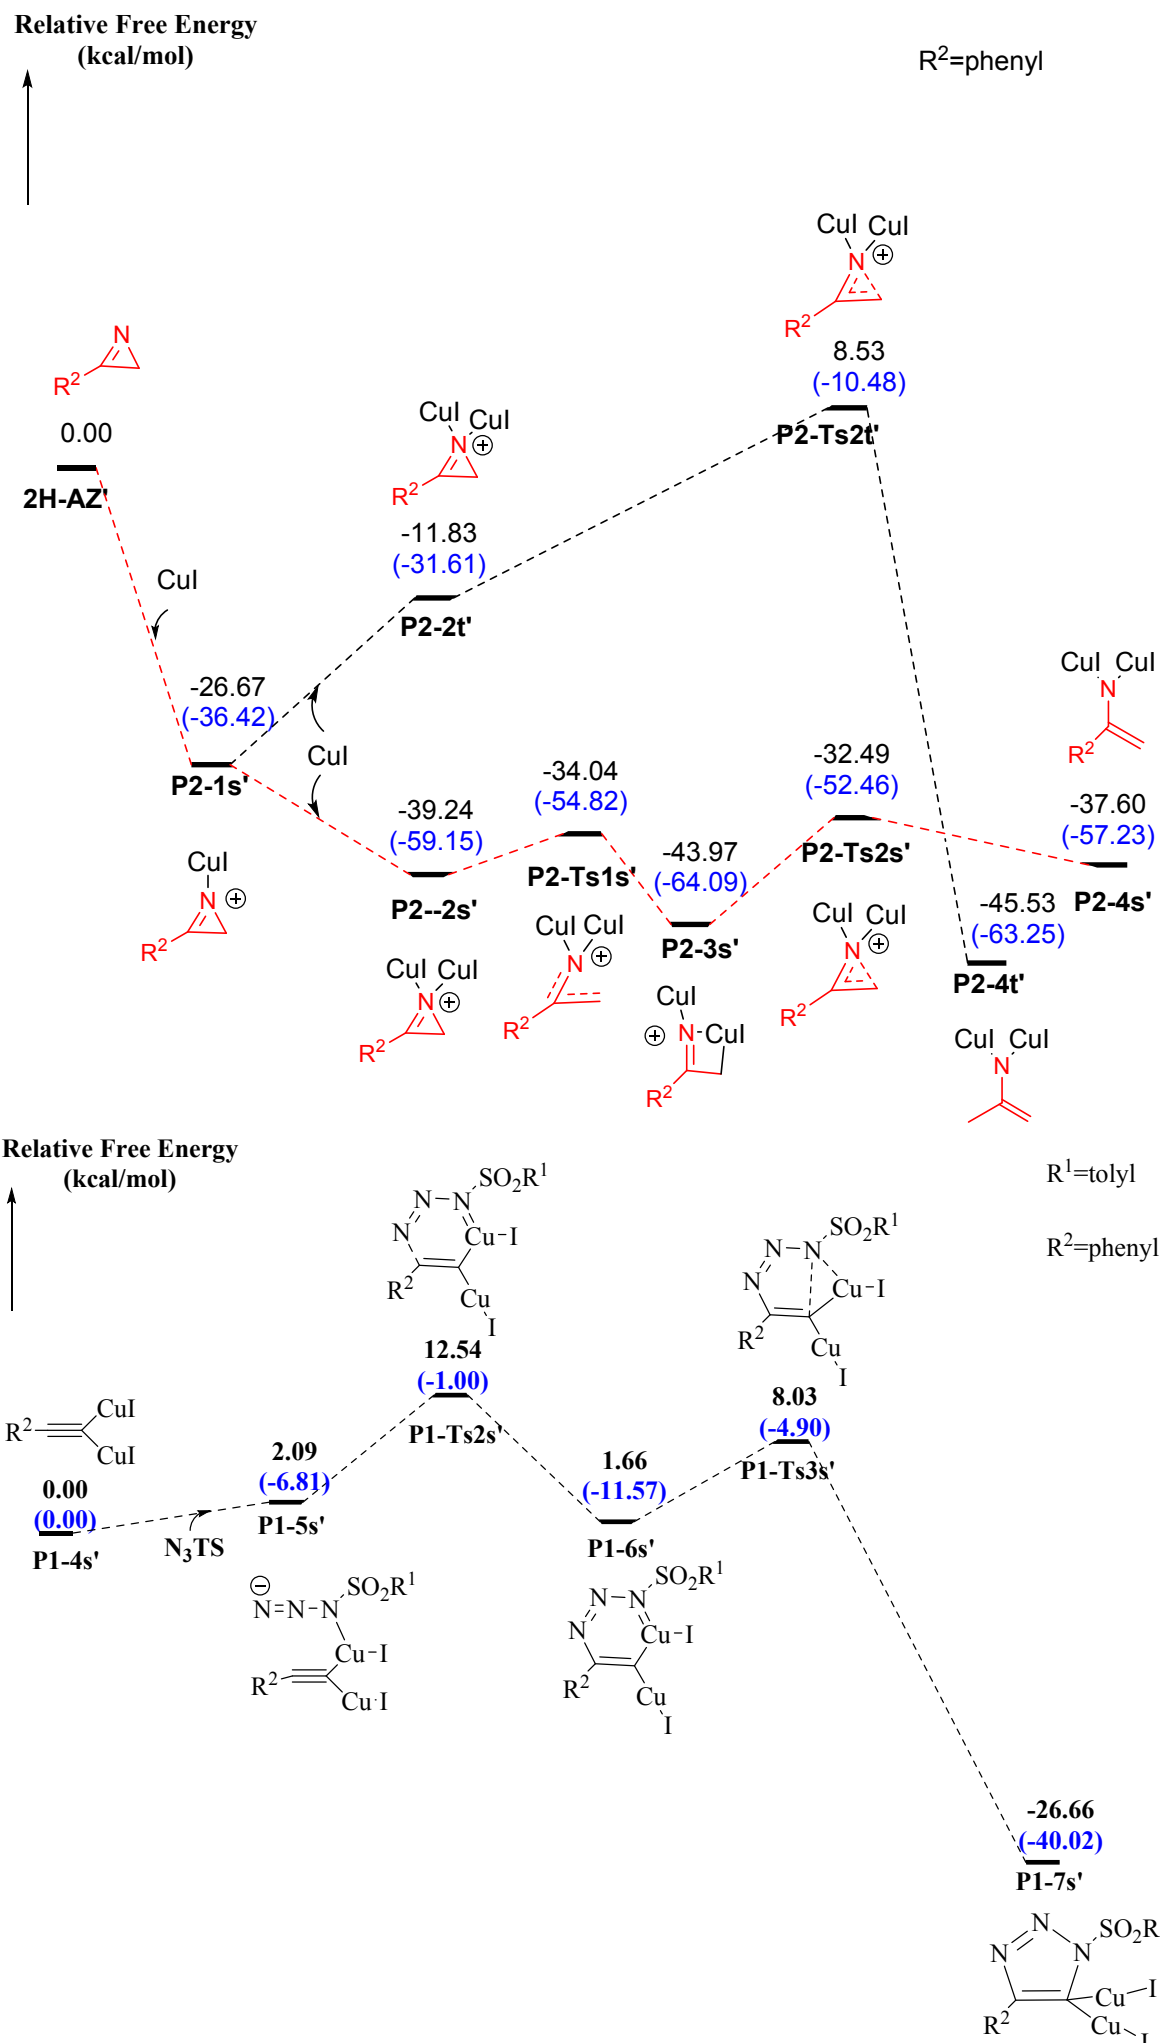

Figure S15. Calculated energy profiles of binuclear 3-phenyl-2H-azirine ring-opening and [3+2] cycloaddition in the

phenylacetylene and  $\text{TsN}_3$  reaction. The relative Gibbs and total energies calculated at the (U)M06-L-D3BJ-IEFPCM/6-31+G(d,p)/Lan12TZ+ level in dichloromethane are given in kcal/mol.

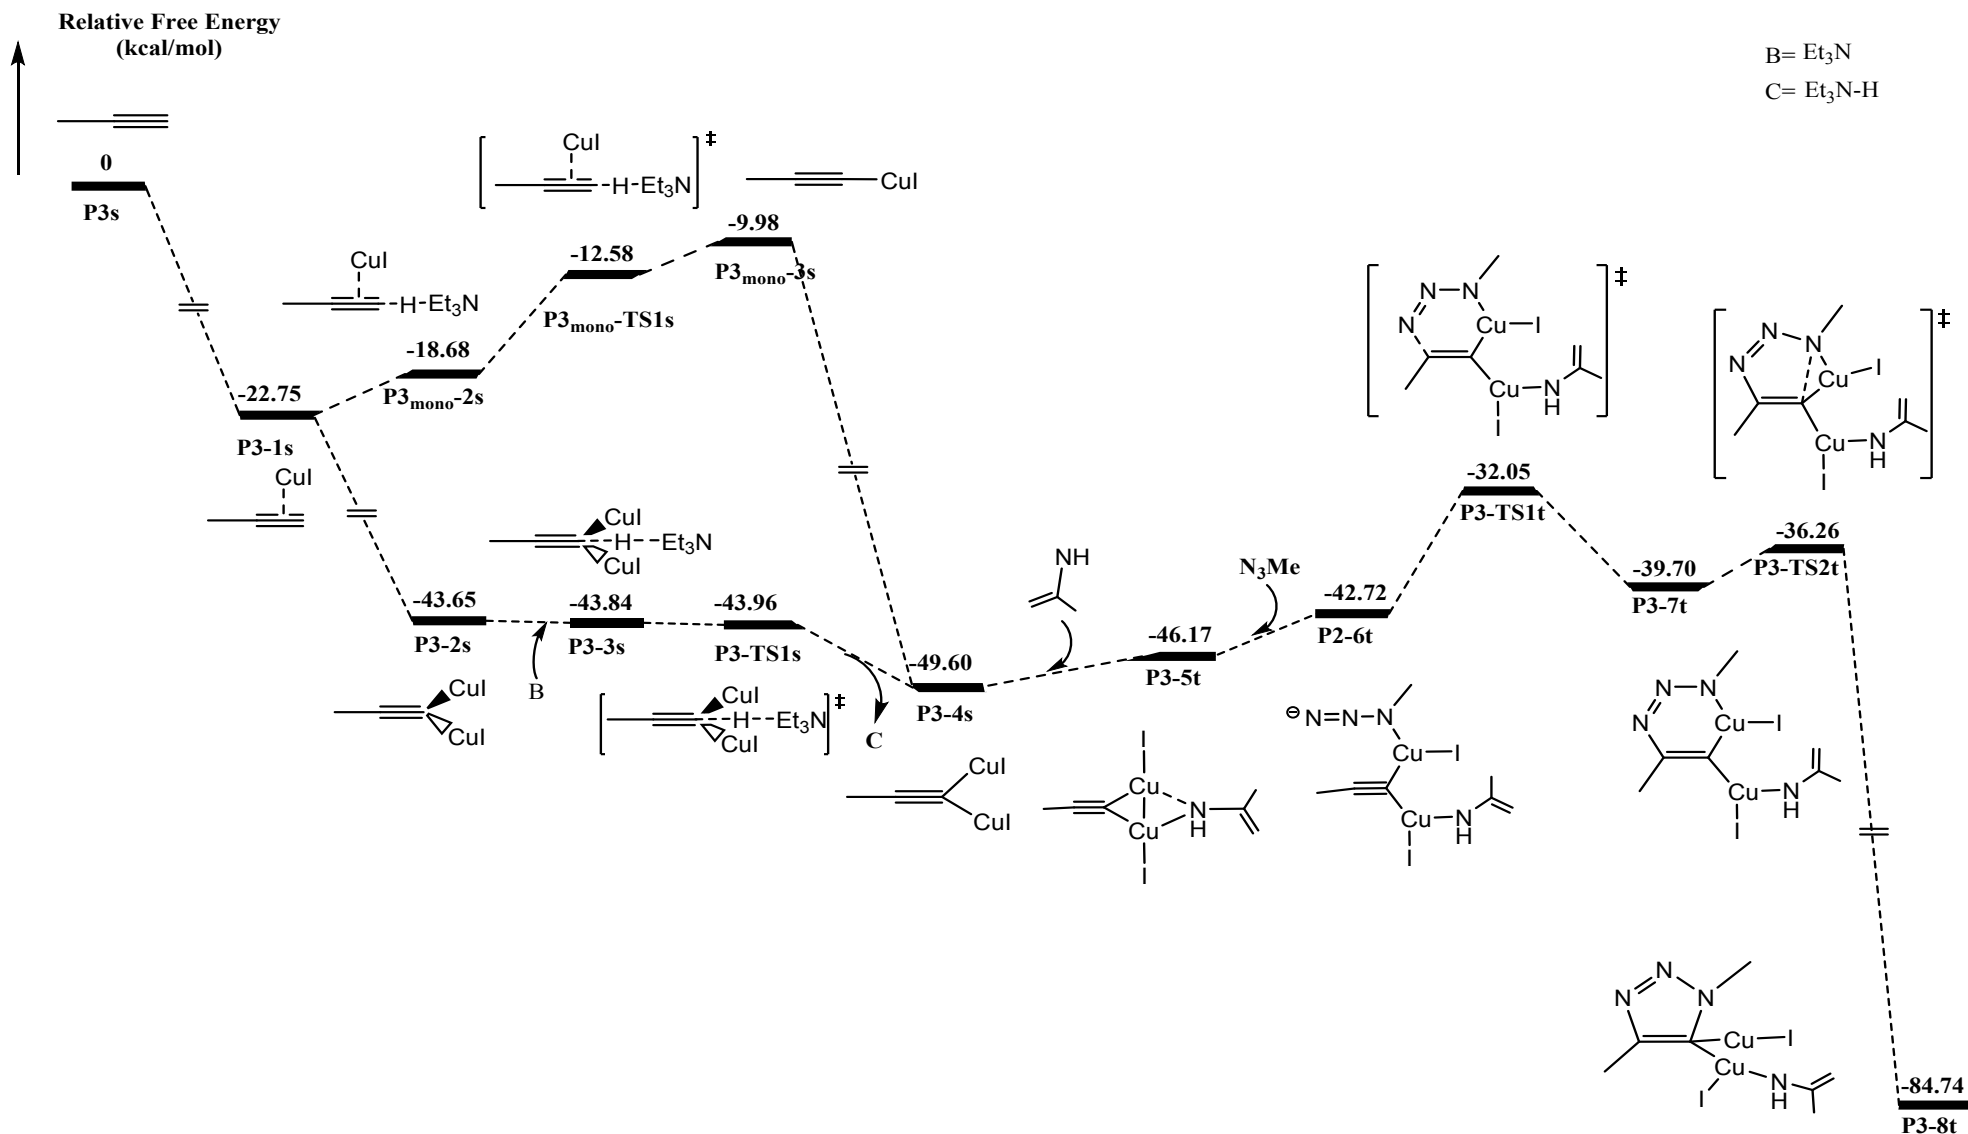

**Figure S16.** Calculated energy profiles of the formation of dinuclear Cu(I)-acetylide from alkyne and copper iodide followed by the ring-opening of 2H-Azirines to form P2-10t and finally [3+2] cycloaddition. The relative Gibbs and total energies calculated at the (U)M06-L-D3BJ-IEFPCM/6-31+G(d,p)/Lanl2TZ+ level in dichloromethane are given in kcal/mol. (named as Path 3).

**Table S1.** Atom contributions of  $\pi$  orbital of P2-1s and P2-2s with AdNDP by B3LYP method (unit:%)

|              | <b>N1</b> | <b>C1</b> | <b>C2</b> | <b>Cu*</b> |
|--------------|-----------|-----------|-----------|------------|
| <b>P2-1s</b> | 53.92     | 33.15     | 7.92      | 3.84       |
| <b>P2-2s</b> | 50.96     | 28.22     | 7.02      | 12.86      |

\*Total contributions from two copper.

**Table S2.** RFC of 2H-Az, P2-1s and P2-2s on N1-C2 and C1-C2 bond (unit: mdyn/Å).

|              | <b>2H-Az</b> | <b>P2-1s</b> | <b>P2-2s</b> |
|--------------|--------------|--------------|--------------|
| <b>N1-C2</b> | 3.175        | 3.300        | 3.165        |
| <b>C1-C2</b> | 5.848        | 5.650        | 5.618        |

**Table S3.** Optimized Cartesian coordinates and corresponding energies at M06-L/6-31G\*/LANL2TZ+ level for all reactants, intermediates, transition states and products in Path1.

**P1-1s**

E= -324.3033204 a.u.

ZPE\_G= 0.022975 a.u.

G= -324.280345 au

|    |              |              |              |
|----|--------------|--------------|--------------|
| C  | 2.572436000  | -1.230237000 | 0.020743000  |
| H  | 2.645172000  | -2.303704000 | 0.034361000  |
| C  | 2.838553000  | -0.020807000 | 0.010230000  |
| C  | 3.370142000  | 1.332042000  | 0.002666000  |
| H  | 3.040726000  | 1.896865000  | 0.880490000  |
| H  | 4.465465000  | 1.288933000  | 0.013923000  |
| H  | 3.058244000  | 1.880652000  | -0.891694000 |
| Cu | 0.798879000  | -0.345315000 | -0.015030000 |
| I  | -1.590666000 | 0.151093000  | -0.055400000 |

**P1<sub>mono</sub>-2s**

E= -616.6781317 a.u.

ZPE\_G= -0.214664 a.u.

G= -616.463468 au

|   |             |              |              |
|---|-------------|--------------|--------------|
| N | 2.708140000 | -0.708370000 | 0.017878000  |
| C | 4.034559000 | -0.617742000 | -0.607109000 |
| C | 1.849913000 | -1.662713000 | -0.699745000 |
| C | 2.834259000 | -1.110357000 | 1.427405000  |
| C | 4.791924000 | 0.634710000  | -0.213022000 |
| C | 1.389087000 | -1.176630000 | -2.059943000 |
| C | 1.599224000 | -0.823006000 | 2.259318000  |
| H | 3.893834000 | -0.617833000 | -1.693661000 |
| H | 4.627915000 | -1.524168000 | -0.370812000 |
| H | 0.965157000 | -1.843698000 | -0.075623000 |
| H | 2.366243000 | -2.640110000 | -0.792302000 |
| H | 3.683517000 | -0.564314000 | 1.854673000  |
| H | 3.097578000 | -2.186058000 | 1.485776000  |
| H | 5.765679000 | 0.663073000  | -0.714503000 |
| H | 4.980990000 | 0.691634000  | 0.865154000  |
| H | 4.236904000 | 1.534964000  | -0.503271000 |
| H | 0.693172000 | -1.901289000 | -2.497049000 |
| H | 2.213543000 | -1.045310000 | -2.769950000 |



|    |              |              |              |
|----|--------------|--------------|--------------|
| H  | 0.858431000  | -0.218117000 | -1.981277000 |
| H  | 1.754717000  | -1.161903000 | 3.289675000  |
| H  | 0.704742000  | -1.334812000 | 1.883233000  |
| H  | 1.380826000  | 0.251318000  | 2.291710000  |
| C  | 0.939813000  | 1.765485000  | -0.043497000 |
| H  | 1.732900000  | 0.993442000  | -0.038484000 |
| C  | 0.138310000  | 2.709884000  | -0.040952000 |
| C  | -0.587742000 | 3.971345000  | -0.046974000 |
| H  | -1.227071000 | 4.070207000  | 0.836155000  |
| H  | 0.124097000  | 4.804657000  | -0.048649000 |
| H  | -1.222449000 | 4.062406000  | -0.934468000 |
| Cu | -0.856940000 | 0.882554000  | -0.011310000 |
| I  | -2.578727000 | -0.845574000 | 0.004974000  |

### **P1mono-TS1s**

E= -616.6675294 au

ZPE\_G= 0.213779 au

G= -616.453750 a.u.

|   |              |              |              |
|---|--------------|--------------|--------------|
| N | -1.588958000 | 1.266651000  | -3.250532000 |
| C | -2.281758000 | -0.023042000 | -3.012572000 |
| C | -2.334515000 | 2.422100000  | -2.688426000 |
| C | -0.182124000 | 1.235808000  | -2.769900000 |
| C | -1.561805000 | -1.213359000 | -3.609770000 |
| C | -3.782877000 | 2.484855000  | -3.122726000 |
| C | 0.552023000  | 2.549325000  | -2.942870000 |
| H | -3.272473000 | 0.067651000  | -3.468805000 |
| H | -2.428900000 | -0.147844000 | -1.928187000 |
| H | -1.816066000 | 3.321676000  | -3.045715000 |
| H | -2.241995000 | 2.403479000  | -1.591516000 |
| H | 0.325098000  | 0.456175000  | -3.347559000 |
| H | -0.181590000 | 0.917187000  | -1.715555000 |
| H | -2.220103000 | -2.086769000 | -3.570269000 |
| H | -0.645430000 | -1.471317000 | -3.069813000 |
| H | -1.305528000 | -1.038053000 | -4.661279000 |
| H | -4.195806000 | 3.457982000  | -2.838214000 |
| H | -4.402784000 | 1.714403000  | -2.653508000 |
| H | -3.877573000 | 2.392667000  | -4.211885000 |
| H | 1.619220000  | 2.387434000  | -2.761283000 |

|    |              |             |              |
|----|--------------|-------------|--------------|
| H  | 0.212723000  | 3.320461000 | -2.244008000 |
| H  | 0.444693000  | 2.941996000 | -3.962540000 |
| C  | -1.484480000 | 1.887594000 | -5.859485000 |
| H  | -1.546434000 | 1.492142000 | -4.503716000 |
| C  | -1.358757000 | 2.157446000 | -7.076568000 |
| C  | -1.199106000 | 2.211286000 | -8.525862000 |
| H  | -0.306898000 | 2.778076000 | -8.814679000 |
| H  | -1.096887000 | 1.197565000 | -8.931318000 |
| H  | -2.061541000 | 2.680683000 | -9.012313000 |
| Cu | -1.590526000 | 3.852935000 | -5.816453000 |
| I  | -1.781445000 | 6.159559000 | -4.995994000 |

### **P1<sub>mono</sub>-3s**

E= -323.8389623 a.u.

ZPE\_G= 0.014117 a.u.

G= -323.824845 a.u.

|    |              |              |              |
|----|--------------|--------------|--------------|
| C  | -2.427582000 | 0.000349000  | -0.000498000 |
| C  | -3.663803000 | 0.000080000  | -0.000170000 |
| C  | -5.119381000 | -0.000459000 | 0.000718000  |
| H  | -5.531458000 | -0.729354000 | 0.712611000  |
| H  | -5.532413000 | 0.980008000  | 0.276208000  |
| H  | -5.532794000 | -0.252652000 | -0.985818000 |
| Cu | -0.577890000 | 0.000304000  | -0.000457000 |
| I  | 1.898492000  | -0.000125000 | 0.000188000  |

### **P1-2s**

E= -531.9675486 a.u.

ZPE\_G= 0.015080 a.u.

G= -531.952469 a.u.

|    |              |              |              |
|----|--------------|--------------|--------------|
| C  | -1.031819000 | 1.510037000  | 0.252751000  |
| H  | 0.048694000  | 1.465258000  | 0.302718000  |
| C  | -2.168188000 | 1.285325000  | -0.277615000 |
| C  | -3.220848000 | 0.838800000  | -1.184933000 |
| H  | -4.219688000 | 1.106139000  | -0.830792000 |
| H  | -3.066367000 | 1.296019000  | -2.168547000 |
| H  | -3.168285000 | -0.250616000 | -1.288952000 |
| Cu | -2.077407000 | 3.197862000  | 0.519235000  |
| I  | -2.756694000 | 5.456298000  | 1.098049000  |

|    |              |             |             |
|----|--------------|-------------|-------------|
| Cu | -2.226651000 | 0.995895000 | 1.775770000 |
| I  | -3.097591000 | 0.421754000 | 3.968680000 |

### P1-3s

E= -824.3506578 a.u.

ZPE\_G= 0.208517 a.u.

G= -824.1721408 a.u.

|    |              |              |              |
|----|--------------|--------------|--------------|
| Cu | -0.554077000 | -1.135960000 | -0.663628000 |
| C  | 0.153494000  | 0.075289000  | 0.765800000  |
| H  | -0.667554000 | 0.522751000  | 1.439380000  |
| C  | 1.183203000  | -0.579724000 | 0.399613000  |
| Cu | 0.790687000  | 1.064470000  | -0.846718000 |
| I  | -2.226604000 | -2.271037000 | -2.019218000 |
| I  | 1.030201000  | 2.750250000  | -2.583381000 |
| C  | 2.439623000  | -1.323720000 | 0.385129000  |
| H  | 3.222984000  | -0.730449000 | 0.869562000  |
| H  | 2.318191000  | -2.261751000 | 0.938450000  |
| H  | 2.766441000  | -1.563531000 | -0.630427000 |
| N  | -2.096180000 | 1.056868000  | 2.191932000  |
| C  | -2.492810000 | 2.254641000  | 1.428376000  |
| C  | -1.919029000 | 1.369033000  | 3.616765000  |
| C  | -3.020681000 | -0.066304000 | 1.974094000  |
| C  | -2.787951000 | 1.998669000  | -0.037587000 |
| C  | -0.876433000 | 2.438454000  | 3.875868000  |
| C  | -2.639149000 | -1.328891000 | 2.721015000  |
| H  | -1.665579000 | 2.971491000  | 1.504374000  |
| H  | -3.368938000 | 2.728710000  | 1.911711000  |
| H  | -1.611293000 | 0.444325000  | 4.116307000  |
| H  | -2.890941000 | 1.663421000  | 4.058623000  |
| H  | -3.011045000 | -0.283451000 | 0.897184000  |
| H  | -4.055933000 | 0.234854000  | 2.223883000  |
| H  | -2.876677000 | 2.955861000  | -0.561789000 |
| H  | -3.720601000 | 1.446723000  | -0.194172000 |
| H  | -1.982436000 | 1.436998000  | -0.531809000 |
| H  | -0.647312000 | 2.477780000  | 4.945775000  |
| H  | -1.209246000 | 3.438150000  | 3.578509000  |
| H  | 0.057067000  | 2.218076000  | 3.342535000  |
| H  | -3.215128000 | -2.172429000 | 2.325989000  |

|   |              |              |             |
|---|--------------|--------------|-------------|
| H | -2.840599000 | -1.268050000 | 3.795492000 |
| H | -1.574847000 | -1.564833000 | 2.588309000 |

### P1-TS1s

E= -824.3487568 a.u.

ZPE\_G= 0.206431 a.u.

G= -824.142326 a.u.

|    |              |              |              |
|----|--------------|--------------|--------------|
| Cu | -0.926865000 | -0.779186000 | 0.724299000  |
| C  | -0.240436000 | 1.053818000  | 1.118202000  |
| H  | -0.755295000 | 1.916752000  | 0.371661000  |
| C  | 0.019151000  | 0.428434000  | 2.201385000  |
| Cu | 1.475937000  | 0.172999000  | 0.665500000  |
| I  | -2.145682000 | -2.523863000 | -0.465648000 |
| I  | 3.502599000  | -0.485806000 | -0.516278000 |
| C  | 0.206117000  | 0.062560000  | 3.602180000  |
| H  | 0.904314000  | 0.759683000  | 4.078680000  |
| H  | -0.752902000 | 0.115992000  | 4.129893000  |
| H  | 0.602001000  | -0.950670000 | 3.715298000  |
| N  | -1.420874000 | 2.769526000  | -0.590623000 |
| C  | -0.501713000 | 2.806625000  | -1.752357000 |
| C  | -1.650111000 | 4.116201000  | -0.031507000 |
| C  | -2.678468000 | 2.053380000  | -0.890280000 |
| C  | -0.304850000 | 1.467137000  | -2.434845000 |
| C  | -0.374599000 | 4.821499000  | 0.381399000  |
| C  | -3.628630000 | 1.971148000  | 0.286471000  |
| H  | 0.465240000  | 3.162574000  | -1.376439000 |
| H  | -0.864386000 | 3.559312000  | -2.473234000 |
| H  | -2.293373000 | 3.991928000  | 0.845516000  |
| H  | -2.213088000 | 4.719921000  | -0.764419000 |
| H  | -2.395407000 | 1.034190000  | -1.184608000 |
| H  | -3.168141000 | 2.514767000  | -1.764530000 |
| H  | 0.526295000  | 1.545413000  | -3.142823000 |
| H  | -1.187604000 | 1.140742000  | -2.993706000 |
| H  | -0.045115000 | 0.673759000  | -1.720617000 |
| H  | -0.625745000 | 5.718367000  | 0.956060000  |
| H  | 0.229714000  | 5.141091000  | -0.473338000 |
| H  | 0.246766000  | 4.181297000  | 1.019648000  |
| H  | -4.414022000 | 1.242333000  | 0.061584000  |

|   |              |             |             |
|---|--------------|-------------|-------------|
| H | -4.117618000 | 2.924522000 | 0.510015000 |
| H | -3.113985000 | 1.628402000 | 1.193719000 |

### P1-4s

E= -531.5328455 a.u.

ZPE\_G= 0.006292 a.u.

G= -531.526554 a.u.

|    |              |              |              |
|----|--------------|--------------|--------------|
| C  | 2.076452000  | -0.001123000 | 0.009112000  |
| C  | 3.315473000  | 0.016943000  | 0.014464000  |
| C  | 4.762952000  | 0.034982000  | 0.020026000  |
| H  | 5.157737000  | 0.673553000  | 0.820520000  |
| H  | 5.168556000  | -0.972042000 | 0.181649000  |
| H  | 5.172050000  | 0.401563000  | -0.929993000 |
| Cu | 0.599507000  | -1.215022000 | 0.010218000  |
| I  | -1.002822000 | -3.087553000 | 0.013603000  |
| Cu | 0.595654000  | 1.210365000  | -0.010146000 |
| I  | -1.008699000 | 3.081444000  | -0.035508000 |

### P1-5s (Cy6-1s)

E= -735.6325235 a.u.

ZPE\_G= 0.049601 a.u.

G= -735.582923 a.u.

|    |              |              |              |
|----|--------------|--------------|--------------|
| Cu | -0.622877000 | 0.622508000  | -0.042568000 |
| Cu | 1.751533000  | 1.017550000  | -0.124814000 |
| C  | 0.792691000  | -0.678161000 | 0.062822000  |
| C  | 0.911979000  | -1.907568000 | 0.186497000  |
| C  | 0.978257000  | -3.349367000 | 0.334088000  |
| H  | -0.027960000 | -3.783047000 | 0.405289000  |
| H  | 1.479209000  | -3.825428000 | -0.518316000 |
| H  | 1.524941000  | -3.643379000 | 1.239047000  |
| N  | 3.882316000  | -1.970039000 | 0.075995000  |
| N  | 3.982058000  | -0.827602000 | -0.019484000 |
| N  | 3.790627000  | 0.394818000  | -0.123150000 |
| C  | 4.987115000  | 1.247902000  | -0.168824000 |
| H  | 5.616741000  | 0.997245000  | -1.028701000 |
| H  | 4.615817000  | 2.269918000  | -0.272370000 |
| H  | 5.567167000  | 1.161030000  | 0.755847000  |
| I  | 1.857917000  | 3.533716000  | -0.365338000 |

I -2.770111000 1.847355000 -0.127806000

### P1-TS2s

E= -735.6238102 a.u.

ZPE\_G= 0.051225 a.u.

G= -735.572585 a.u.

|    |              |              |              |
|----|--------------|--------------|--------------|
| Cu | -1.036487000 | 0.829725000  | 0.000172000  |
| Cu | 1.248175000  | 0.030852000  | 0.000443000  |
| C  | 0.594930000  | 1.817649000  | 0.000424000  |
| C  | 1.107787000  | 2.977544000  | 0.000255000  |
| C  | 1.004900000  | 4.439532000  | 0.001032000  |
| H  | -0.045483000 | 4.749549000  | 0.000314000  |
| H  | 1.491828000  | 4.872357000  | 0.882934000  |
| H  | 1.493527000  | 4.873563000  | -0.879312000 |
| N  | 3.074353000  | 2.823339000  | -0.000967000 |
| N  | 3.547796000  | 1.729462000  | -0.000834000 |
| N  | 3.182762000  | 0.503063000  | 0.001570000  |
| C  | 4.272527000  | -0.473762000 | -0.002703000 |
| H  | 4.881783000  | -0.393680000 | -0.910818000 |
| H  | 4.916856000  | -0.361986000 | 0.877200000  |
| H  | 3.804923000  | -1.460787000 | 0.023498000  |
| I  | 0.884353000  | -2.478251000 | 0.000360000  |
| I  | -3.397516000 | 0.116127000  | -0.000437000 |

### P1-6s

E= -735.6413846 a.u.

ZPE\_G= 0.053663 a.u.

G= -735.587722 a.u.

|    |              |              |              |
|----|--------------|--------------|--------------|
| Cu | -0.745555000 | -0.672595000 | 0.119753000  |
| Cu | 1.410095000  | 0.486381000  | -0.052711000 |
| C  | 1.017941000  | -1.313899000 | 0.128426000  |
| C  | 1.825263000  | -2.361189000 | 0.203092000  |
| C  | 1.383476000  | -3.785118000 | 0.350559000  |
| H  | 0.293954000  | -3.871034000 | 0.390535000  |
| H  | 1.751519000  | -4.384777000 | -0.490915000 |
| H  | 1.802831000  | -4.218539000 | 1.266749000  |
| N  | 3.262735000  | -2.273180000 | 0.152216000  |
| N  | 3.854502000  | -1.162675000 | 0.029933000  |

|   |              |              |              |
|---|--------------|--------------|--------------|
| N | 3.285301000  | -0.001864000 | -0.062049000 |
| C | 4.219814000  | 1.117536000  | -0.196506000 |
| H | 4.027715000  | 1.654151000  | -1.132247000 |
| H | 4.079862000  | 1.822177000  | 0.630774000  |
| H | 5.249338000  | 0.747394000  | -0.191679000 |
| I | 0.739270000  | 2.916161000  | -0.264649000 |
| I | -3.195540000 | -0.420701000 | 0.171952000  |

### P1-TS3s

E= -735.6359834 a.u.

ZPE\_G= 0.054949 a.u.

G= -735.5810344 a.u.

|    |              |              |              |
|----|--------------|--------------|--------------|
| Cu | -1.212222000 | 0.717688000  | -0.050489000 |
| Cu | 1.225639000  | 0.093421000  | -0.106380000 |
| C  | 0.331021000  | 1.737781000  | -0.299350000 |
| C  | 0.877571000  | 2.914675000  | -0.632323000 |
| C  | 0.213357000  | 3.878663000  | -1.568542000 |
| H  | -0.756443000 | 3.512617000  | -1.915883000 |
| H  | 0.066328000  | 4.845185000  | -1.071618000 |
| H  | 0.851885000  | 4.054060000  | -2.442214000 |
| N  | 2.107975000  | 3.386007000  | -0.131266000 |
| N  | 2.699576000  | 2.626316000  | 0.714128000  |
| N  | 2.187936000  | 1.478131000  | 1.035367000  |
| C  | 2.903656000  | 0.769704000  | 2.099909000  |
| H  | 2.182713000  | 0.186554000  | 2.680284000  |
| H  | 3.649649000  | 0.080515000  | 1.683149000  |
| H  | 3.399540000  | 1.487997000  | 2.760216000  |
| I  | 1.774997000  | -2.333165000 | -0.356281000 |
| I  | -3.373201000 | -0.420179000 | 0.241743000  |

### P1-7s (Cy5-1s)

E= -735.7146687 a.u.

ZPE\_G= 0.056164 a.u.

G= -735.6585047 a.u.

|    |              |              |              |
|----|--------------|--------------|--------------|
| Cu | -0.548312000 | -0.271821000 | 0.083493000  |
| Cu | 1.650674000  | 0.676573000  | -0.156049000 |
| C  | 1.180477000  | -1.217788000 | 0.115154000  |
| C  | 1.483145000  | -2.191471000 | -0.853254000 |



|   |              |              |              |
|---|--------------|--------------|--------------|
| C | 1.276494000  | -2.121290000 | -2.322982000 |
| H | 0.901237000  | -1.135107000 | -2.616874000 |
| H | 2.209548000  | -2.306578000 | -2.868147000 |
| H | 0.551815000  | -2.871533000 | -2.662729000 |
| N | 2.018686000  | -3.287883000 | -0.259108000 |
| N | 2.079978000  | -3.079281000 | 1.042205000  |
| N | 1.584676000  | -1.854985000 | 1.273808000  |
| C | 1.526738000  | -1.351346000 | 2.629504000  |
| H | 2.119554000  | -0.435991000 | 2.719446000  |
| H | 0.491287000  | -1.134670000 | 2.909265000  |
| H | 1.932712000  | -2.117349000 | 3.292625000  |
| I | -2.913333000 | 0.400664000  | 0.105408000  |
| I | 2.744824000  | 2.849989000  | -0.509558000 |

**P1-TS4s (Cy5-TS1s)**

E= -735.687365 a.u.

ZPE\_G= 0.058435 a.u.

G= -735.628930 a.u.

|    |              |              |              |
|----|--------------|--------------|--------------|
| Cu | -2.052592000 | 0.407374000  | 0.368013000  |
| C  | 0.396100000  | 1.463741000  | 0.064942000  |
| C  | -0.568449000 | 1.672841000  | 1.080172000  |
| Cu | 1.943011000  | 0.381088000  | 0.017443000  |
| C  | -0.459408000 | 1.346614000  | 2.535956000  |
| H  | -1.437491000 | 1.371842000  | 3.028269000  |
| H  | -0.020650000 | 0.355156000  | 2.689201000  |
| H  | 0.185668000  | 2.072725000  | 3.048994000  |
| N  | -1.540505000 | 2.566028000  | 0.617413000  |
| N  | -1.232332000 | 2.922456000  | -0.609614000 |
| N  | -0.076646000 | 2.271831000  | -0.924730000 |
| C  | 0.461345000  | 2.430414000  | -2.259406000 |
| H  | 1.537232000  | 2.613639000  | -2.204124000 |
| H  | 0.281117000  | 1.526231000  | -2.849522000 |
| H  | -0.036402000 | 3.279117000  | -2.732528000 |
| I  | 3.971676000  | -1.018197000 | -0.009510000 |
| I  | -3.525690000 | -1.432520000 | -0.259735000 |

**P1<sub>mono</sub>-8s**

E= -528.0237943 a.u.

ZPE\_G= 0.064324 a.u.

G= -527.959471 a.u.

|    |              |              |              |
|----|--------------|--------------|--------------|
| Cu | -0.124009000 | 0.019003000  | -0.002586000 |
| C  | 1.782815000  | 0.031836000  | -0.001143000 |
| C  | 2.721531000  | 1.072554000  | 0.001004000  |
| N  | 2.599902000  | -1.067686000 | -0.001401000 |
| C  | 2.485883000  | 2.554738000  | 0.000745000  |
| N  | 3.988639000  | 0.561248000  | 0.002060000  |
| N  | 3.917201000  | -0.750760000 | 0.000865000  |
| C  | 2.215191000  | -2.471094000 | 0.001452000  |
| H  | 1.412451000  | 2.769065000  | 0.011717000  |
| H  | 2.934961000  | 3.036955000  | 0.878950000  |
| H  | 2.916210000  | 3.034272000  | -0.888416000 |
| H  | 1.648762000  | -2.709509000 | 0.906573000  |
| H  | 1.599674000  | -2.696943000 | -0.873932000 |
| H  | 3.126459000  | -3.071752000 | -0.027337000 |
| I  | -2.619150000 | 0.014321000  | 0.000838000  |

### P1-8s

E= -735.7145488 a.u.

ZPE\_G= 0.058283 a.u.

G= -735.656266 a.u.

|    |              |              |             |
|----|--------------|--------------|-------------|
| Cu | 0.055841000  | 0.168158000  | 0.939261000 |
| C  | 1.802230000  | 0.381898000  | 1.634634000 |
| C  | 2.594660000  | 1.488379000  | 1.944193000 |
| N  | 2.638575000  | -0.649478000 | 1.974056000 |
| C  | 2.287495000  | 2.935362000  | 1.813417000 |
| N  | 3.797663000  | 1.058309000  | 2.426331000 |
| N  | 3.834612000  | -0.265725000 | 2.448729000 |
| C  | 2.361472000  | -2.066448000 | 1.871831000 |
| H  | 1.279103000  | 3.073359000  | 1.410393000 |
| H  | 2.336710000  | 3.453307000  | 2.780135000 |
| H  | 2.990573000  | 3.443971000  | 1.140934000 |
| H  | 1.493160000  | -2.322422000 | 2.485478000 |
| H  | 2.152303000  | -2.332013000 | 0.831747000 |
| H  | 3.236884000  | -2.615140000 | 2.223936000 |
| I  | -2.212571000 | -0.199272000 | 0.036378000 |
| Cu | 5.291296000  | 2.064633000  | 3.016137000 |

|   |             |             |             |
|---|-------------|-------------|-------------|
| I | 7.208070000 | 3.366387000 | 3.773142000 |
|---|-------------|-------------|-------------|

### **P1a-1s**

E= -907.7228999 a.u.

ZPE\_G= 0.126363 a.u.

G= -907.596537 a.u.

|    |              |              |              |
|----|--------------|--------------|--------------|
| Cu | 2.417986000  | 0.487120000  | 0.348438000  |
| C  | 0.598599000  | -0.095767000 | 0.484072000  |
| C  | -0.611744000 | 0.455033000  | 0.055684000  |
| N  | 0.168368000  | -1.269018000 | 1.046321000  |
| C  | -0.862822000 | 1.727780000  | -0.667360000 |
| N  | -1.633766000 | -0.388321000 | 0.380638000  |
| N  | -1.162276000 | -1.460477000 | 1.001485000  |
| C  | 0.984218000  | -2.259624000 | 1.714473000  |
| H  | 0.016701000  | 2.378043000  | -0.607891000 |
| H  | -1.078085000 | 1.561978000  | -1.731626000 |
| H  | -1.719375000 | 2.270856000  | -0.247412000 |
| H  | 1.937712000  | -2.340695000 | 1.182495000  |
| H  | 1.174934000  | -1.962499000 | 2.751430000  |
| H  | 0.460380000  | -3.217747000 | 1.702336000  |
| I  | 4.201006000  | -1.471596000 | -0.739460000 |
| Cu | -3.491266000 | -0.162250000 | 0.088447000  |
| I  | -5.873344000 | 0.220477000  | -0.265112000 |
| C  | 4.523322000  | 2.797687000  | 0.296278000  |
| C  | 5.153060000  | 1.944247000  | 1.277845000  |
| H  | 5.914698000  | 1.221037000  | 0.975960000  |
| H  | 5.133111000  | 2.202497000  | 2.338297000  |
| N  | 3.804290000  | 1.800991000  | 0.603637000  |
| C  | 4.545386000  | 3.961627000  | -0.588133000 |
| H  | 5.380469000  | 3.879554000  | -1.294127000 |
| H  | 3.609927000  | 4.049048000  | -1.148297000 |
| H  | 4.712159000  | 4.877872000  | -0.010235000 |

### **P1a-2t**

E= -907.696937 a.u.

ZPE\_G= 0.119122 a.u.

G= -907.577815 a.u.

|    |              |              |             |
|----|--------------|--------------|-------------|
| Cu | -3.466215000 | -0.124575000 | 0.122872000 |
|----|--------------|--------------|-------------|

|    |              |              |              |
|----|--------------|--------------|--------------|
| C  | 0.624909000  | -0.156652000 | 0.494552000  |
| C  | -0.569019000 | 0.415807000  | 0.054662000  |
| Cu | 2.457550000  | 0.464135000  | 0.249259000  |
| C  | -0.783717000 | 1.662246000  | -0.723671000 |
| H  | 0.138963000  | 2.251666000  | -0.759314000 |
| H  | -1.083284000 | 1.453988000  | -1.759343000 |
| H  | -1.569341000 | 2.287842000  | -0.280914000 |
| N  | -1.614007000 | -0.373752000 | 0.438432000  |
| N  | -1.167884000 | -1.425374000 | 1.108772000  |
| N  | 0.168461000  | -1.280087000 | 1.126195000  |
| C  | 0.954250000  | -2.270550000 | 1.830659000  |
| H  | 0.312619000  | -3.124123000 | 2.056669000  |
| H  | 1.792992000  | -2.580970000 | 1.200455000  |
| H  | 1.346367000  | -1.850207000 | 2.762406000  |
| C  | 4.525718000  | 2.743595000  | 0.246578000  |
| N  | 3.493445000  | 1.946351000  | 0.314910000  |
| C  | 4.405287000  | 4.091607000  | 0.610327000  |
| C  | 5.855444000  | 2.203631000  | -0.234074000 |
| H  | 6.143514000  | 1.320591000  | 0.345430000  |
| H  | 5.782118000  | 1.887904000  | -1.280616000 |
| H  | 6.645350000  | 2.956985000  | -0.151658000 |
| H  | 3.449939000  | 4.485580000  | 0.949127000  |
| H  | 5.257611000  | 4.766372000  | 0.566036000  |
| I  | 4.039240000  | -1.542658000 | -0.621799000 |
| I  | -5.835522000 | 0.261320000  | -0.303341000 |

### **P1b-1s**

E= -1028.5592507 a.u.

ZPE\_G= 0.268492 a.u.

G= -1028.290759 a.u.

|    |              |              |              |
|----|--------------|--------------|--------------|
| Cu | -2.439200000 | -0.930367000 | 0.214016000  |
| C  | -0.608384000 | -0.706813000 | 0.674607000  |
| C  | 0.563494000  | -0.760262000 | -0.083560000 |
| C  | 0.740854000  | -0.963316000 | -1.543702000 |
| H  | -0.230608000 | -1.040604000 | -2.042668000 |
| H  | 1.302360000  | -0.141676000 | -2.008765000 |
| H  | 1.295822000  | -1.885589000 | -1.756281000 |
| N  | 1.638240000  | -0.615434000 | 0.745712000  |

|    |              |              |              |
|----|--------------|--------------|--------------|
| N  | 1.232889000  | -0.471610000 | 1.997719000  |
| N  | -0.105714000 | -0.526968000 | 1.939839000  |
| C  | -0.853338000 | -0.384119000 | 3.172717000  |
| H  | -1.572271000 | -1.201820000 | 3.264626000  |
| H  | -0.149610000 | -0.412073000 | 4.006036000  |
| H  | -1.390700000 | 0.569888000  | 3.182626000  |
| H  | -1.548105000 | 1.300355000  | 0.133188000  |
| I  | -4.798481000 | -1.119726000 | -0.456216000 |
| Cu | 3.468913000  | -0.469167000 | 0.267781000  |
| I  | 5.777725000  | -0.202060000 | -0.447666000 |
| N  | -1.659388000 | 2.273119000  | -0.225691000 |
| C  | -0.882712000 | 3.190063000  | 0.684181000  |
| C  | -3.137277000 | 2.570626000  | -0.197359000 |
| C  | -1.094399000 | 2.260461000  | -1.624202000 |
| C  | 0.594048000  | 2.884890000  | 0.734762000  |
| C  | -3.729099000 | 2.454752000  | 1.185599000  |
| C  | -1.892342000 | 1.410451000  | -2.583185000 |
| H  | -1.330202000 | 3.080767000  | 1.674626000  |
| H  | -1.086475000 | 4.207295000  | 0.331484000  |
| H  | -3.602177000 | 1.832430000  | -0.857428000 |
| H  | -3.264213000 | 3.565971000  | -0.637329000 |
| H  | -0.076279000 | 1.873730000  | -1.522558000 |
| H  | -1.030385000 | 3.306223000  | -1.945321000 |
| H  | 1.045725000  | 3.494255000  | 1.522920000  |
| H  | 1.114245000  | 3.120363000  | -0.198291000 |
| H  | 0.784482000  | 1.835648000  | 0.986885000  |
| H  | -4.819265000 | 2.474547000  | 1.098538000  |
| H  | -3.432741000 | 3.265343000  | 1.857265000  |
| H  | -3.465777000 | 1.491626000  | 1.643923000  |
| H  | -1.294262000 | 1.243001000  | -3.483868000 |
| H  | -2.831930000 | 1.879939000  | -2.887993000 |
| H  | -2.126540000 | 0.427347000  | -2.150204000 |

### **P1b-TS1s**

E= -1028.5298993 a.u.

ZPE\_G= 0.262181 a.u.

G= -1028.267718 a.u.

|    |              |              |             |
|----|--------------|--------------|-------------|
| Cu | -2.258291000 | -0.728901000 | 0.203615000 |
|----|--------------|--------------|-------------|

|    |              |              |              |
|----|--------------|--------------|--------------|
| C  | -0.622049000 | 0.347474000  | 0.470315000  |
| C  | 0.555686000  | 0.068896000  | -0.242151000 |
| C  | 0.751745000  | -0.237262000 | -1.677414000 |
| H  | -0.204352000 | -0.322589000 | -2.200996000 |
| H  | 1.348314000  | 0.540855000  | -2.170267000 |
| H  | 1.289540000  | -1.183976000 | -1.805336000 |
| N  | 1.603868000  | 0.119655000  | 0.620420000  |
| N  | 1.176654000  | 0.428743000  | 1.841129000  |
| N  | -0.134553000 | 0.567352000  | 1.749396000  |
| C  | -0.888854000 | 0.905736000  | 2.940976000  |
| H  | -1.630572000 | 0.128959000  | 3.143811000  |
| H  | -0.189165000 | 0.978792000  | 3.773652000  |
| H  | -1.393253000 | 1.866502000  | 2.802300000  |
| H  | -1.443031000 | 1.244493000  | 0.037354000  |
| I  | -4.264731000 | -2.068255000 | -0.116521000 |
| Cu | 3.447177000  | -0.198401000 | 0.267274000  |
| I  | 5.777258000  | -0.620311000 | -0.265081000 |
| N  | -2.128970000 | 2.453084000  | -0.518932000 |
| C  | -1.599852000 | 3.658754000  | 0.156205000  |
| C  | -3.586540000 | 2.303389000  | -0.307466000 |
| C  | -1.775655000 | 2.449427000  | -1.958894000 |
| C  | -0.108427000 | 3.862682000  | -0.011268000 |
| C  | -3.991993000 | 2.208616000  | 1.147384000  |
| C  | -2.418036000 | 1.327686000  | -2.748942000 |
| H  | -1.838051000 | 3.562463000  | 1.220685000  |
| H  | -2.152868000 | 4.539263000  | -0.213481000 |
| H  | -3.891030000 | 1.379274000  | -0.813578000 |
| H  | -4.108444000 | 3.134456000  | -0.811483000 |
| H  | -0.683593000 | 2.358181000  | -2.014441000 |
| H  | -2.035883000 | 3.429038000  | -2.393907000 |
| H  | 0.217496000  | 4.674261000  | 0.646529000  |
| H  | 0.167990000  | 4.141045000  | -1.032881000 |
| H  | 0.464286000  | 2.968677000  | 0.264551000  |
| H  | -5.057016000 | 1.962376000  | 1.205993000  |
| H  | -3.838202000 | 3.137775000  | 1.705214000  |
| H  | -3.451082000 | 1.400780000  | 1.659049000  |
| H  | -1.909412000 | 1.224468000  | -3.712713000 |
| H  | -3.479111000 | 1.504013000  | -2.950259000 |

|   |              |             |              |
|---|--------------|-------------|--------------|
| H | -2.339300000 | 0.362417000 | -2.227242000 |
|---|--------------|-------------|--------------|

### **P1b-2s**

E= -1028.5388558 a.u.

ZPE\_G= -1028.5388558 a.u.

G= -1028.278960 a.u.

|    |              |              |              |
|----|--------------|--------------|--------------|
| Cu | 1.123538000  | 0.811449000  | 0.086756000  |
| C  | 0.886163000  | -1.230301000 | 0.427627000  |
| C  | -0.269419000 | -0.876921000 | -0.288089000 |
| C  | -0.542585000 | -0.825259000 | -1.748852000 |
| H  | 0.384119000  | -0.836743000 | -2.328794000 |
| H  | -1.137062000 | -1.697605000 | -2.046637000 |
| H  | -1.110032000 | 0.070971000  | -2.020759000 |
| N  | -1.294836000 | -0.818590000 | 0.636555000  |
| N  | -0.851789000 | -1.121949000 | 1.837935000  |
| N  | 0.446296000  | -1.378161000 | 1.720557000  |
| C  | 1.234897000  | -1.696641000 | 2.896685000  |
| H  | 1.743299000  | -0.798301000 | 3.258682000  |
| H  | 0.559816000  | -2.074137000 | 3.664775000  |
| H  | 1.971620000  | -2.458436000 | 2.634028000  |
| H  | 1.895373000  | -1.552983000 | 0.102156000  |
| I  | 2.246338000  | 2.961815000  | 0.060357000  |
| Cu | -3.125298000 | -0.443454000 | 0.282387000  |
| I  | -5.429142000 | 0.013858000  | -0.328009000 |
| N  | 3.777631000  | -1.855368000 | -0.582717000 |
| C  | 4.176585000  | -3.191055000 | -0.121761000 |
| C  | 4.708231000  | -0.836898000 | -0.078869000 |
| C  | 3.672810000  | -1.834973000 | -2.047627000 |
| C  | 3.143888000  | -4.271052000 | -0.382799000 |
| C  | 4.548240000  | -0.565117000 | 1.403887000  |
| C  | 3.271880000  | -0.490695000 | -2.624893000 |
| H  | 4.356653000  | -3.127035000 | 0.957790000  |
| H  | 5.146031000  | -3.474271000 | -0.581650000 |
| H  | 4.503976000  | 0.096423000  | -0.614500000 |
| H  | 5.755433000  | -1.115424000 | -0.315345000 |
| H  | 2.913585000  | -2.578679000 | -2.321327000 |
| H  | 4.622414000  | -2.175692000 | -2.510014000 |
| H  | 3.447367000  | -5.201740000 | 0.108661000  |



|   |             |              |              |
|---|-------------|--------------|--------------|
| H | 3.021772000 | -4.494579000 | -1.448192000 |
| H | 2.160371000 | -3.990336000 | 0.016725000  |
| H | 5.212695000 | 0.249878000  | 1.711102000  |
| H | 4.779299000 | -1.432225000 | 2.033367000  |
| H | 3.519668000 | -0.247056000 | 1.625003000  |
| H | 2.914094000 | -0.613552000 | -3.652876000 |
| H | 4.094114000 | 0.231933000  | -2.649137000 |
| H | 2.459834000 | -0.030957000 | -2.040757000 |

**P1b-2s**

E= -528.513437 a.u.

ZPE\_G= 0.075997 a.u.

G= -528.437440 a.u.

|    |              |              |              |
|----|--------------|--------------|--------------|
| C  | 3.674296000  | 0.755183000  | -0.006602000 |
| C  | 2.359554000  | 1.163211000  | -0.001736000 |
| C  | 1.761966000  | 2.518374000  | 0.000166000  |
| H  | 2.532366000  | 3.284501000  | -0.118491000 |
| H  | 1.038968000  | 2.631166000  | -0.815630000 |
| H  | 1.228560000  | 2.715753000  | 0.937385000  |
| N  | 1.603107000  | 0.025946000  | 0.006182000  |
| N  | 2.375048000  | -1.049215000 | 0.007054000  |
| N  | 3.630126000  | -0.597531000 | -0.000934000 |
| C  | 4.735231000  | -1.536697000 | -0.006263000 |
| H  | 5.353070000  | -1.386280000 | 0.881888000  |
| H  | 4.315093000  | -2.542380000 | 0.000186000  |
| H  | 5.339414000  | -1.392349000 | -0.904810000 |
| H  | 4.605391000  | 1.304021000  | -0.016101000 |
| Cu | -0.293273000 | -0.104581000 | 0.006543000  |
| I  | -2.723626000 | -0.144083000 | -0.002900000 |

**Figure S15.** Optimized Cartesian coordinates and corresponding energy at M06-L/6-31G\*/LANL2TZ+ level for all reactants, intermediates, transition states and products in Path2.

**2H-azirine**

E= -171.9991647 a.u.

ZPE\_G= 0.047528 a.u.

G= -171.951637 a.u.

|   |              |              |              |
|---|--------------|--------------|--------------|
| C | -0.116172000 | 0.029022000  | 0.000004000  |
| C | 1.198785000  | -0.559809000 | -0.000001000 |
| H | 1.641345000  | -0.940665000 | 0.923161000  |
| H | 1.641286000  | -0.940703000 | -0.923175000 |
| N | 0.788279000  | 0.912757000  | -0.000004000 |
| C | -1.572695000 | -0.127165000 | -0.000018000 |
| H | -1.889916000 | -0.700074000 | 0.878993000  |
| H | -2.080445000 | 0.842117000  | -0.001212000 |
| H | -1.889733000 | -0.702261000 | -0.877650000 |

**P2-1s**

E= -379.6742906 a.u.

ZPE\_G= 0.040119 a.u.

G= -379.634171 a.u.

|    |              |              |              |
|----|--------------|--------------|--------------|
| C  | -3.386255000 | 0.101988000  | -0.000166000 |
| C  | -3.310781000 | -1.343315000 | -0.000434000 |
| H  | -3.452202000 | -1.903146000 | 0.924917000  |
| H  | -3.451321000 | -1.902742000 | -0.926165000 |
| N  | -2.193795000 | -0.322000000 | 0.000348000  |
| C  | -4.167047000 | 1.334676000  | -0.000169000 |
| H  | -4.823479000 | 1.358400000  | 0.877204000  |
| H  | -3.521587000 | 2.216634000  | 0.000976000  |
| H  | -4.821670000 | 1.359485000  | -0.878874000 |
| Cu | -0.336679000 | -0.148406000 | 0.000371000  |
| I  | 2.082548000  | 0.091869000  | -0.000125000 |

**P2-2s**

E= -587.3295907 a.u.

ZPE\_G= 0.030721 a.u.

G= -587.298870 a.u.

|   |              |             |             |
|---|--------------|-------------|-------------|
| C | 0.557092000  | 3.083806000 | 0.000000000 |
| C | -0.874221000 | 3.271376000 | 0.000000000 |

|    |              |              |             |
|----|--------------|--------------|-------------|
| N  | -0.086166000 | 1.968434000  | 0.000000000 |
| C  | 1.910266000  | 3.608628000  | 0.000000000 |
| H  | -1.391660000 | 3.516143000  | 0.926942000 |
| H  | 2.054198000  | 4.253038000  | 0.875955000 |
| H  | 2.652987000  | 2.807323000  | 0.000000000 |
| Cu | -0.078864000 | 0.465945000  | 1.236968000 |
| I  | -0.078864000 | -1.122004000 | 3.075170000 |

### P2-TS1s

E= -587.3254678 a.u.

ZPE\_G= 0.032179 a.u.

G= -587.293289 a.u.

|    |              |              |              |
|----|--------------|--------------|--------------|
| C  | 0.375435000  | -0.344601000 | -3.082377000 |
| C  | -0.673097000 | -1.300756000 | -2.856950000 |
| H  | -1.704342000 | -1.042212000 | -3.093844000 |
| H  | -0.428133000 | -2.356183000 | -2.743071000 |
| N  | 0.074088000  | -0.314880000 | -1.845701000 |
| C  | 1.257495000  | 0.331176000  | -4.022197000 |
| H  | 0.664721000  | 0.772727000  | -4.831298000 |
| H  | 1.848729000  | 1.105356000  | -3.527284000 |
| H  | 1.924001000  | -0.402274000 | -4.490805000 |
| Cu | -0.835108000 | -1.226814000 | -0.355437000 |
| I  | -1.925165000 | -2.346197000 | 1.493572000  |
| Cu | 0.358601000  | 0.952717000  | -0.396627000 |
| I  | 0.760344000  | 2.669541000  | 1.267618000  |

### P2-3s

E= -587.3282703 a.u.

ZPE\_G= 0.030708 a.u.

G= -587.297562 a.u.

|   |              |             |              |
|---|--------------|-------------|--------------|
| C | -0.362585000 | 2.849972000 | 0.000053000  |
| C | -1.811032000 | 2.600599000 | 0.000420000  |
| H | -2.356934000 | 2.747906000 | 0.934645000  |
| H | -2.357476000 | 2.748119000 | -0.933455000 |
| N | 0.032886000  | 1.629048000 | -0.000480000 |
| C | 0.432509000  | 4.086370000 | 0.000274000  |
| H | 0.182103000  | 4.692381000 | 0.879438000  |
| H | 1.504366000  | 3.869723000 | 0.000720000  |

|    |              |              |              |
|----|--------------|--------------|--------------|
| H  | 0.182868000  | 4.692161000  | -0.879269000 |
| Cu | -1.539309000 | 0.605850000  | -0.000184000 |
| I  | -3.113694000 | -1.270847000 | 0.000066000  |
| Cu | 1.423789000  | 0.432736000  | -0.000229000 |
| I  | 3.423347000  | -0.946026000 | 0.000100000  |

### P2-TS2s

E= -587.3095711 a.u.

ZPE\_G= 0.027928 a.u.

G= -587.281643 a.u.

|    |              |              |              |
|----|--------------|--------------|--------------|
| C  | -0.018658000 | 2.711251000  | -0.061451000 |
| C  | -1.345386000 | 3.154551000  | 0.126560000  |
| H  | -1.596330000 | 3.897973000  | 0.884287000  |
| H  | -2.168579000 | 2.684244000  | -0.409570000 |
| N  | 0.030513000  | 1.403619000  | -0.205433000 |
| C  | 1.171856000  | 3.589869000  | 0.076299000  |
| H  | 1.165217000  | 4.104127000  | 1.044631000  |
| H  | 2.095971000  | 3.007745000  | -0.005881000 |
| H  | 1.169431000  | 4.364953000  | -0.698575000 |
| Cu | 1.492629000  | 0.326929000  | 0.039885000  |
| I  | 3.526124000  | -0.996667000 | 0.008177000  |
| Cu | -1.519233000 | 0.407095000  | -0.155519000 |
| I  | -3.506401000 | -1.001542000 | 0.050844000  |

### P2-4s

E= -587.311492 a.u.

ZPE\_G= 0.031724 a.u.

G= -587.279768 a.u.

|    |              |             |              |
|----|--------------|-------------|--------------|
| C  | -0.075732000 | 2.758748000 | 0.008720000  |
| C  | 1.081474000  | 3.503872000 | -0.079634000 |
| H  | 1.061864000  | 4.590271000 | -0.140581000 |
| H  | 2.054058000  | 3.014708000 | -0.117493000 |
| N  | 0.004522000  | 1.408868000 | 0.002692000  |
| C  | -1.418507000 | 3.425578000 | 0.076338000  |
| H  | -2.026492000 | 3.147616000 | -0.792983000 |
| H  | -1.960574000 | 3.093383000 | 0.969545000  |
| H  | -1.341303000 | 4.516017000 | 0.107080000  |
| Cu | -1.482826000 | 0.347568000 | -0.019504000 |

|    |              |              |              |
|----|--------------|--------------|--------------|
| I  | -3.455660000 | -1.062142000 | -0.000903000 |
| Cu | 1.523781000  | 0.400318000  | 0.015446000  |
| I  | 3.521125000  | -0.976386000 | 0.001671000  |

### P2-1t

E= -379.575125 a.u.

ZPE\_G= 0.035232 a.u.

G= -379.539893 a.u.

|    |              |              |              |
|----|--------------|--------------|--------------|
| C  | -3.421539000 | 0.110957000  | -0.450128000 |
| C  | -3.294361000 | -1.211807000 | 0.142641000  |
| H  | -3.687898000 | -1.360247000 | 1.156288000  |
| H  | -3.261290000 | -2.136832000 | -0.441183000 |
| N  | -2.137235000 | -0.357402000 | -0.018888000 |
| C  | -4.075558000 | 1.313878000  | 0.107945000  |
| H  | -3.945233000 | 1.365040000  | 1.202233000  |
| H  | -3.642142000 | 2.228495000  | -0.312850000 |
| H  | -5.150446000 | 1.309620000  | -0.101352000 |
| Cu | -0.343103000 | -0.196973000 | -0.031543000 |
| I  | 2.063140000  | 0.104336000  | 0.013983000  |

### P2-2t

E= -587.2601038 a.u.

ZPE\_G= 0.030650 a.u.

G= -587.229454 a.u.

|    |              |              |              |
|----|--------------|--------------|--------------|
| C  | -0.218477000 | 3.162018000  | 0.315172000  |
| C  | -0.135030000 | 3.083684000  | -1.131925000 |
| H  | -1.042743000 | 3.194425000  | -1.732617000 |
| H  | 0.784390000  | 3.348252000  | -1.657326000 |
| N  | -0.057466000 | 1.875285000  | -0.281237000 |
| C  | -1.318205000 | 3.541442000  | 1.221702000  |
| H  | -2.288613000 | 3.196998000  | 0.822216000  |
| H  | -1.191953000 | 3.087623000  | 2.211394000  |
| H  | -1.375023000 | 4.627820000  | 1.343203000  |
| Cu | -1.217127000 | 0.400543000  | -0.198056000 |
| I  | -2.936040000 | -1.299278000 | 0.035699000  |
| Cu | 1.318952000  | 0.610302000  | -0.108570000 |
| I  | 3.173654000  | -0.938826000 | 0.104758000  |

**P2-TS2t**

E= -587.2332526 a.u.

ZPE\_G= 0.026079 a.u.

G= -587.207174 a.u.

|    |              |              |              |
|----|--------------|--------------|--------------|
| C  | 0.172542000  | 3.065975000  | -0.081367000 |
| C  | 0.122909000  | 3.006723000  | 1.315771000  |
| H  | 0.983627000  | 3.263802000  | 1.947920000  |
| H  | -0.778991000 | 2.695330000  | 1.837187000  |
| N  | 0.034626000  | 1.674902000  | -0.018542000 |
| C  | 1.094828000  | 3.780940000  | -0.986850000 |
| H  | 2.143482000  | 3.482658000  | -0.817791000 |
| H  | 0.859026000  | 3.561052000  | -2.033565000 |
| H  | 1.025016000  | 4.861504000  | -0.830133000 |
| Cu | 1.305954000  | 0.356786000  | 0.120093000  |
| I  | 3.148294000  | -1.222108000 | -0.021794000 |
| Cu | -1.371890000 | 0.489911000  | -0.072124000 |
| I  | -3.354031000 | -0.914962000 | -0.031984000 |

**P2-4t**

E= -587.3184457 a.u.

ZPE\_G= 0.027565 a.u.

G= -587.290881 a.u.

|    |              |              |              |
|----|--------------|--------------|--------------|
| C  | 0.045130000  | 2.947227000  | -0.000073000 |
| C  | -1.138297000 | 3.690539000  | 0.000067000  |
| H  | -1.116057000 | 4.777166000  | 0.000018000  |
| H  | -2.107140000 | 3.194821000  | 0.000280000  |
| N  | 0.007127000  | 1.628480000  | 0.000022000  |
| C  | 1.384509000  | 3.633537000  | -0.000392000 |
| H  | 1.965694000  | 3.342289000  | 0.881700000  |
| H  | 1.964778000  | 3.343123000  | -0.883372000 |
| H  | 1.274531000  | 4.721011000  | 0.000165000  |
| Cu | 1.273263000  | 0.307316000  | 0.000610000  |
| I  | 3.255572000  | -1.092766000 | -0.000148000 |
| Cu | -1.303975000 | 0.353975000  | -0.000197000 |
| I  | -3.310083000 | -1.012573000 | -0.000013000 |

**P2-TS<sub>mono</sub>S**

E= -379.6124096 a.u.

ZPE\_G= 0.038662 a.u.

G= -379.573747 a.u.

|    |              |              |              |
|----|--------------|--------------|--------------|
| C  | 3.131218000  | 0.063462000  | 0.000003000  |
| C  | 4.394714000  | -0.514622000 | 0.000006000  |
| H  | 5.316098000  | 0.069939000  | 0.000002000  |
| H  | 4.476500000  | -1.599332000 | 0.000010000  |
| N  | 2.114636000  | -0.800454000 | 0.000002000  |
| C  | 2.963180000  | 1.560207000  | -0.000002000 |
| H  | 2.389242000  | 1.870229000  | -0.880863000 |
| H  | 2.389287000  | 1.870239000  | 0.880886000  |
| H  | 3.915366000  | 2.101044000  | -0.000028000 |
| Cu | 0.375474000  | -0.355807000 | -0.000006000 |
| I  | -2.020988000 | 0.093494000  | 0.000002000  |

### **P2-TS<sub>mono</sub>t**

E= -379.5457124 a.u.

ZPE\_G= 0.032937 a.u.

G= -379.512776 a.u.

|    |              |              |              |
|----|--------------|--------------|--------------|
| C  | 3.383762000  | -0.074773000 | -0.111846000 |
| C  | 2.997402000  | -1.095017000 | 0.755709000  |
| H  | 2.830474000  | -2.109963000 | 0.400237000  |
| H  | 2.833879000  | -0.928303000 | 1.829306000  |
| N  | 2.133412000  | -0.303807000 | -0.713681000 |
| C  | 3.867342000  | 1.285371000  | 0.229702000  |
| H  | 3.153008000  | 1.825369000  | 0.873645000  |
| H  | 4.821537000  | 1.223872000  | 0.762422000  |
| H  | 4.009557000  | 1.885271000  | -0.675144000 |
| Cu | 0.382998000  | -0.227343000 | -0.332832000 |
| I  | -1.984534000 | 0.115658000  | 0.117284000  |

### **P2-Nit**

E= -379.6396173 a.u.

ZPE\_G= 0.032728 a.u.

G= -379.606889 a.u.

|   |             |              |              |
|---|-------------|--------------|--------------|
| C | 3.353939000 | -0.075151000 | -0.000110000 |
| N | 2.058178000 | -0.046842000 | -0.000013000 |
| C | 4.042843000 | -1.301049000 | -0.000001000 |
| C | 4.115648000 | 1.229590000  | -0.000010000 |

|    |              |              |              |
|----|--------------|--------------|--------------|
| H  | 4.761260000  | 1.286313000  | -0.882592000 |
| H  | 3.437340000  | 2.085482000  | -0.004145000 |
| H  | 4.754448000  | 1.289890000  | 0.887310000  |
| Cu | 0.287747000  | -0.016780000 | -0.000001000 |
| H  | 3.499913000  | -2.242018000 | 0.000326000  |
| H  | 5.129736000  | -1.321654000 | -0.000105000 |
| I  | -2.139796000 | 0.011248000  | 0.000001000  |

### Di-CP1

E= -587.3128348 a.u.

ZPE\_G= 0.032916 a.u.

G= -587.2799188 a.u.

|    |              |              |              |
|----|--------------|--------------|--------------|
| C  | -0.083715000 | 2.769290000  | 0.040779000  |
| C  | 1.081918000  | 3.512746000  | -0.164683000 |
| H  | 1.038132000  | 4.570008000  | -0.419103000 |
| H  | 2.051344000  | 3.017784000  | -0.200148000 |
| N  | -0.008824000 | 1.444005000  | 0.038151000  |
| C  | -1.416483000 | 3.450221000  | 0.154044000  |
| H  | -1.979946000 | 3.348370000  | -0.781481000 |
| H  | -2.014464000 | 2.988701000  | 0.947236000  |
| H  | -1.307224000 | 4.516199000  | 0.373974000  |
| Cu | -1.414603000 | 0.289460000  | -0.144799000 |
| I  | -3.392790000 | -1.116305000 | -0.062860000 |
| Cu | 1.451859000  | 0.355099000  | 0.170133000  |
| I  | 3.480525000  | -0.977159000 | 0.079152000  |

### Mono-CP1

E= -379.627978 a.u.

ZPE\_G= 0.040610 a.u.

G= -379.587368 a.u.

|    |             |              |              |
|----|-------------|--------------|--------------|
| C  | 3.349822000 | 0.092096000  | 0.061820000  |
| N  | 2.083462000 | 0.174653000  | -0.043600000 |
| C  | 3.870190000 | -1.254748000 | 0.039775000  |
| C  | 4.255947000 | 1.283532000  | 0.064374000  |
| H  | 4.947465000 | 1.232682000  | -0.784489000 |
| H  | 3.687707000 | 2.214960000  | 0.007987000  |
| H  | 4.862063000 | 1.284579000  | 0.977625000  |
| Cu | 0.328665000 | -0.086159000 | -0.048296000 |



|   |              |              |              |
|---|--------------|--------------|--------------|
| H | 3.233543000  | -2.079321000 | 0.348616000  |
| H | 4.750315000  | -1.480732000 | -0.563074000 |
| I | -2.067923000 | -0.482511000 | -0.060078000 |

**Alkyne C-H active**

**P2-5t**

E= -703.9738381 a.u.

ZPE\_G= 0.079042 a.u.

G= -703.8947961 a.u.

|    |              |             |              |
|----|--------------|-------------|--------------|
| C  | 10.930960000 | 7.784824000 | 1.690435000  |
| N  | 11.764599000 | 7.163545000 | 0.878880000  |
| C  | 9.665331000  | 8.361091000 | 1.107761000  |
| Cu | 11.772009000 | 6.844040000 | -0.935017000 |
| I  | 11.445867000 | 6.738460000 | -3.349138000 |
| C  | 13.786765000 | 4.715054000 | -0.583533000 |
| H  | 12.971408000 | 4.023998000 | -0.698900000 |
| C  | 14.881566000 | 5.266266000 | -0.649097000 |
| C  | 16.154271000 | 5.942251000 | -0.744172000 |
| H  | 16.682256000 | 5.922832000 | 0.215874000  |
| H  | 16.780080000 | 5.444097000 | -1.493533000 |
| H  | 16.028064000 | 6.987190000 | -1.049116000 |
| Cu | 13.387450000 | 6.200562000 | 0.974167000  |
| C  | 11.205939000 | 7.912687000 | 3.054044000  |
| H  | 9.903465000  | 9.136700000 | 0.370867000  |
| H  | 9.091372000  | 7.585092000 | 0.589183000  |
| I  | 14.861923000 | 6.369331000 | 3.025865000  |
| H  | 9.033417000  | 8.802570000 | 1.883014000  |
| H  | 12.124784000 | 7.501565000 | 3.468262000  |
| H  | 10.511630000 | 8.424395000 | 3.715876000  |

**P2-6t**

E= -996.3555136 a.u.

ZPE\_G= 0.271734 a.u.

G= -996.0837796 a.u.

|    |              |              |              |
|----|--------------|--------------|--------------|
| C  | 0.307067000  | -2.601969000 | -1.572315000 |
| N  | 0.203635000  | -1.712405000 | -0.605778000 |
| C  | -0.946878000 | -3.271453000 | -2.072580000 |
| Cu | -1.199938000 | -0.878288000 | 0.333085000  |

|    |              |              |              |
|----|--------------|--------------|--------------|
| I  | -3.659348000 | -0.773317000 | 0.527460000  |
| C  | -0.087949000 | 0.891322000  | 1.301682000  |
| H  | -0.408157000 | 1.618541000  | 0.497179000  |
| C  | 0.411855000  | 0.561004000  | 2.385048000  |
| C  | 0.955032000  | 0.105892000  | 3.642450000  |
| H  | 1.997207000  | 0.426608000  | 3.755011000  |
| H  | 0.375138000  | 0.509757000  | 4.479884000  |
| H  | 0.930417000  | -0.988045000 | 3.712397000  |
| Cu | 1.338522000  | -0.490290000 | 0.305588000  |
| C  | 1.552670000  | -2.910621000 | -2.126776000 |
| H  | -1.494920000 | -3.729625000 | -1.241976000 |
| H  | -1.615084000 | -2.532352000 | -2.531224000 |
| I  | 3.822456000  | -0.295179000 | 0.201382000  |
| H  | -0.721348000 | -4.042279000 | -2.814659000 |
| H  | 2.451221000  | -2.413617000 | -1.763421000 |
| H  | 1.644828000  | -3.645202000 | -2.923092000 |
| N  | -0.528772000 | 2.734497000  | -0.910455000 |
| C  | 0.286750000  | 3.899984000  | -0.535243000 |
| C  | -1.907928000 | 3.131871000  | -1.224518000 |
| C  | 0.116107000  | 1.972631000  | -1.990127000 |
| C  | 1.730805000  | 3.568354000  | -0.212730000 |
| C  | -2.612376000 | 3.811172000  | -0.066244000 |
| C  | -0.757115000 | 0.920301000  | -2.642050000 |
| H  | -0.180387000 | 4.353999000  | 0.346101000  |
| H  | 0.244126000  | 4.656740000  | -1.344618000 |
| H  | -2.460518000 | 2.222414000  | -1.483971000 |
| H  | -1.924133000 | 3.785375000  | -2.120025000 |
| H  | 1.003629000  | 1.482830000  | -1.551107000 |
| H  | 0.504227000  | 2.661780000  | -2.765278000 |
| H  | 2.224072000  | 4.452486000  | 0.204855000  |
| H  | 2.302155000  | 3.261986000  | -1.095888000 |
| H  | 1.806026000  | 2.764653000  | 0.531176000  |
| H  | -3.685490000 | 3.876331000  | -0.274852000 |
| H  | -2.252974000 | 4.829851000  | 0.114585000  |
| H  | -2.487777000 | 3.236540000  | 0.860674000  |
| H  | -0.135226000 | 0.265542000  | -3.262686000 |
| H  | -1.530037000 | 1.355015000  | -3.284427000 |
| H  | -1.262947000 | 0.284169000  | -1.900719000 |

## P2-TS3t

E= -996.3540974 a.u.

ZPE\_G= 0.273213 a.u.

G= -996.0808844 a.u.

|    |              |              |              |
|----|--------------|--------------|--------------|
| C  | 0.062195000  | -2.829315000 | -1.122926000 |
| N  | 0.071786000  | -1.811621000 | -0.288088000 |
| C  | -1.258317000 | -3.463196000 | -1.476229000 |
| Cu | -1.205385000 | -0.643908000 | 0.531976000  |
| I  | -3.698674000 | -0.652557000 | 0.498153000  |
| C  | -0.067040000 | 1.023268000  | 1.153365000  |
| H  | -0.345767000 | 1.711056000  | 0.177607000  |
| C  | 0.708546000  | 1.102915000  | 2.130295000  |
| C  | 1.542908000  | 1.241109000  | 3.300915000  |
| H  | 2.498437000  | 1.712350000  | 3.036608000  |
| H  | 1.050756000  | 1.855113000  | 4.063565000  |
| H  | 1.774103000  | 0.265676000  | 3.745506000  |
| Cu | 1.296072000  | -0.513285000 | 0.409682000  |
| C  | 1.256099000  | -3.305479000 | -1.674647000 |
| H  | -1.768706000 | -3.812560000 | -0.571822000 |
| H  | -1.917891000 | -2.725126000 | -1.948275000 |
| I  | 3.779972000  | -0.473462000 | 0.082757000  |
| H  | -1.130157000 | -4.308266000 | -2.158439000 |
| H  | 2.202482000  | -2.831535000 | -1.417082000 |
| H  | 1.260113000  | -4.145330000 | -2.365551000 |
| N  | -0.417553000 | 2.564198000  | -1.060787000 |
| C  | 0.435651000  | 3.741521000  | -0.795605000 |
| C  | -1.824759000 | 2.945829000  | -1.289451000 |
| C  | 0.148067000  | 1.711161000  | -2.127845000 |
| C  | 1.906125000  | 3.413690000  | -0.628554000 |
| C  | -2.425388000 | 3.729621000  | -0.140670000 |
| C  | -0.781792000 | 0.628869000  | -2.634441000 |
| H  | 0.060891000  | 4.205577000  | 0.123794000  |
| H  | 0.292794000  | 4.474581000  | -1.609147000 |
| H  | -2.392294000 | 2.018345000  | -1.420059000 |
| H  | -1.901443000 | 3.512791000  | -2.234232000 |
| H  | 1.055128000  | 1.246982000  | -1.706174000 |
| H  | 0.483270000  | 2.346626000  | -2.964880000 |

|   |              |              |              |
|---|--------------|--------------|--------------|
| H | 2.433670000  | 4.301185000  | -0.264272000 |
| H | 2.381970000  | 3.112117000  | -1.567651000 |
| H | 2.065897000  | 2.608615000  | 0.100106000  |
| H | -3.509981000 | 3.793058000  | -0.274884000 |
| H | -2.041997000 | 4.753007000  | -0.075588000 |
| H | -2.241480000 | 3.231393000  | 0.819529000  |
| H | -0.210234000 | -0.081532000 | -3.241683000 |
| H | -1.592824000 | 1.026077000  | -3.253354000 |
| H | -1.238834000 | 0.059364000  | -1.813063000 |

## P2-7t

E= -996.3777201 a.u.

ZPE\_G= 0.281690 a.u.

G= -996.0960301 a.u.

|    |              |              |              |
|----|--------------|--------------|--------------|
| C  | -1.681299000 | 1.806181000  | 1.319580000  |
| N  | -0.651380000 | 1.402754000  | 0.602006000  |
| C  | -2.935575000 | 2.250495000  | 0.610085000  |
| Cu | -0.241632000 | 0.780869000  | -1.213103000 |
| I  | -2.001229000 | 0.980176000  | -3.020243000 |
| C  | 1.469187000  | -0.176923000 | -1.086873000 |
| H  | 0.074912000  | -1.729844000 | -0.676641000 |
| C  | 2.545097000  | -0.588705000 | -0.601769000 |
| C  | 3.838569000  | -1.124523000 | -0.210315000 |
| H  | 3.829939000  | -1.457317000 | 0.836149000  |
| H  | 4.122741000  | -1.977486000 | -0.839558000 |
| H  | 4.624014000  | -0.364489000 | -0.300732000 |
| Cu | 1.071604000  | 0.541147000  | 0.857871000  |
| C  | -1.619395000 | 1.824930000  | 2.716600000  |
| H  | -2.713835000 | 3.071825000  | -0.080248000 |
| H  | -3.341954000 | 1.433877000  | 0.000254000  |
| I  | 2.126728000  | 0.265724000  | 3.141597000  |
| H  | -3.702929000 | 2.580474000  | 1.316762000  |
| H  | -0.712797000 | 1.503361000  | 3.227584000  |
| H  | -2.467299000 | 2.158033000  | 3.311480000  |
| N  | -0.372908000 | -2.665569000 | -0.598324000 |
| C  | 0.758526000  | -3.636490000 | -0.364633000 |
| C  | -1.058035000 | -2.912018000 | -1.918546000 |
| C  | -1.339134000 | -2.623896000 | 0.557391000  |

|   |              |              |              |
|---|--------------|--------------|--------------|
| C | 1.379046000  | -3.520916000 | 1.007127000  |
| C | -0.102515000 | -2.885555000 | -3.086304000 |
| C | -2.519533000 | -1.712684000 | 0.320028000  |
| H | 1.494872000  | -3.418008000 | -1.143517000 |
| H | 0.349629000  | -4.636292000 | -0.550354000 |
| H | -1.798641000 | -2.113892000 | -2.025744000 |
| H | -1.586901000 | -3.866843000 | -1.820511000 |
| H | -0.759357000 | -2.282356000 | 1.420387000  |
| H | -1.644412000 | -3.659809000 | 0.742867000  |
| H | 2.316241000  | -4.085842000 | 1.013811000  |
| H | 0.740814000  | -3.929801000 | 1.795843000  |
| H | 1.619561000  | -2.480367000 | 1.263884000  |
| H | -0.686908000 | -2.874532000 | -4.010944000 |
| H | 0.558672000  | -3.756448000 | -3.120752000 |
| H | 0.508275000  | -1.974150000 | -3.074309000 |
| H | -3.027674000 | -1.543310000 | 1.274494000  |
| H | -3.249090000 | -2.132514000 | -0.378612000 |
| H | -2.201937000 | -0.732180000 | -0.060625000 |

## P2-8t

E= -996.3767469 a.u.

ZPE\_G= 0.282728 a.u.

G= -996.0940189 a.u.

|    |              |              |              |
|----|--------------|--------------|--------------|
| C  | -0.761255000 | 0.835624000  | 1.227276000  |
| N  | -0.153709000 | 0.117274000  | 0.271511000  |
| C  | -2.026960000 | 1.572958000  | 0.869710000  |
| Cu | 0.146282000  | 0.640448000  | -1.616742000 |
| I  | -1.859655000 | 0.894743000  | -3.118355000 |
| C  | 2.077978000  | 0.690000000  | -1.797248000 |
| H  | -0.866031000 | -1.584593000 | -0.067423000 |
| C  | 3.300980000  | 0.554672000  | -1.599770000 |
| C  | 4.748678000  | 0.453722000  | -1.531384000 |
| H  | 5.063615000  | -0.550552000 | -1.223693000 |
| H  | 5.200325000  | 0.664192000  | -2.508135000 |
| H  | 5.167558000  | 1.164177000  | -0.808586000 |
| Cu | 1.775694000  | -0.133703000 | 0.087024000  |
| C  | -0.272074000 | 0.877626000  | 2.523502000  |
| H  | -1.810294000 | 2.381535000  | 0.160677000  |

|   |              |              |              |
|---|--------------|--------------|--------------|
| H | -2.742167000 | 0.906613000  | 0.373583000  |
| I | 3.116524000  | -1.337329000 | 1.858249000  |
| H | -2.502939000 | 2.005487000  | 1.754838000  |
| H | 0.654276000  | 0.364172000  | 2.780353000  |
| H | -0.802188000 | 1.416868000  | 3.305694000  |
| N | -1.140555000 | -2.589359000 | -0.149925000 |
| C | -0.231033000 | -3.347566000 | 0.783093000  |
| C | -0.932093000 | -2.983621000 | -1.588028000 |
| C | -2.585308000 | -2.695394000 | 0.265233000  |
| C | -0.434493000 | -2.991544000 | 2.234943000  |
| C | 0.510301000  | -2.895189000 | -2.025353000 |
| C | -3.541223000 | -2.031233000 | -0.695387000 |
| H | 0.790522000  | -3.095071000 | 0.479596000  |
| H | -0.400014000 | -4.412256000 | 0.583368000  |
| H | -1.549755000 | -2.299237000 | -2.177631000 |
| H | -1.338759000 | -3.995657000 | -1.698437000 |
| H | -2.647039000 | -2.229341000 | 1.252273000  |
| H | -2.794088000 | -3.764955000 | 0.383340000  |
| H | 0.371383000  | -3.448361000 | 2.817042000  |
| H | -1.385126000 | -3.355350000 | 2.636261000  |
| H | -0.368517000 | -1.906884000 | 2.392939000  |
| H | 0.551000000  | -2.982603000 | -3.115241000 |
| H | 1.138526000  | -3.683678000 | -1.600712000 |
| H | 0.954688000  | -1.922077000 | -1.768119000 |
| H | -4.523380000 | -1.963479000 | -0.218402000 |
| H | -3.664135000 | -2.591691000 | -1.626787000 |
| H | -3.223482000 | -1.012303000 | -0.952001000 |

## P2-TS4t

E= -996.3675626 a.u.

ZPE\_G= 0.275837 a.u.

G= -996.091726 a.u.

|    |              |              |              |
|----|--------------|--------------|--------------|
| C  | 0.227610000  | 0.498261000  | 2.136576000  |
| N  | 0.118861000  | 0.448428000  | 0.785364000  |
| C  | 0.766051000  | 1.756889000  | 2.757392000  |
| Cu | 1.135449000  | -1.205973000 | 0.036856000  |
| I  | 3.593991000  | -0.882468000 | -0.069383000 |
| C  | -0.313188000 | -2.429913000 | -0.299187000 |

|    |              |              |              |
|----|--------------|--------------|--------------|
| H  | 0.362359000  | 1.515976000  | 0.051576000  |
| C  | -1.085744000 | -3.366108000 | -0.535823000 |
| C  | -1.974509000 | -4.470366000 | -0.825419000 |
| H  | -3.020715000 | -4.139565000 | -0.814775000 |
| H  | -1.774642000 | -4.898666000 | -1.814741000 |
| H  | -1.874514000 | -5.271832000 | -0.083983000 |
| Cu | -1.330295000 | -0.713576000 | 0.085094000  |
| C  | -0.128643000 | -0.574205000 | 2.929381000  |
| H  | 1.780763000  | 1.963884000  | 2.394678000  |
| H  | 0.142205000  | 2.621188000  | 2.498942000  |
| I  | -3.684481000 | 0.102670000  | -0.004821000 |
| H  | 0.803362000  | 1.680477000  | 3.847287000  |
| H  | -0.498697000 | -1.498681000 | 2.484145000  |
| H  | -0.045611000 | -0.529813000 | 4.012323000  |
| N  | 0.481277000  | 2.494698000  | -0.781715000 |
| C  | -0.905577000 | 2.971456000  | -1.038727000 |
| C  | 1.104302000  | 1.935366000  | -2.014196000 |
| C  | 1.320729000  | 3.579390000  | -0.203805000 |
| C  | -1.601472000 | 3.504451000  | 0.192697000  |
| C  | 0.298089000  | 0.840127000  | -2.677201000 |
| C  | 2.771957000  | 3.198650000  | -0.009641000 |
| H  | -1.468587000 | 2.113072000  | -1.419940000 |
| H  | -0.865466000 | 3.725273000  | -1.839979000 |
| H  | 2.079036000  | 1.536891000  | -1.713004000 |
| H  | 1.287066000  | 2.765935000  | -2.713492000 |
| H  | 0.873432000  | 3.843024000  | 0.759320000  |
| H  | 1.227359000  | 4.462245000  | -0.854781000 |
| H  | -2.654989000 | 3.682367000  | -0.043805000 |
| H  | -1.180211000 | 4.447943000  | 0.554468000  |
| H  | -1.578273000 | 2.769386000  | 1.007626000  |
| H  | 0.912250000  | 0.366419000  | -3.449684000 |
| H  | -0.617365000 | 1.202145000  | -3.155251000 |
| H  | 0.018470000  | 0.048901000  | -1.964802000 |
| H  | 3.253532000  | 3.938665000  | 0.637340000  |
| H  | 3.330931000  | 3.168850000  | -0.950073000 |
| H  | 2.876213000  | 2.216269000  | 0.469047000  |

E= -996.3763513 a.u.

ZPE\_G= 0.278851 a.u.

G= -996.0975003 a.u.

|    |              |              |              |
|----|--------------|--------------|--------------|
| C  | -0.539335000 | 0.792785000  | 1.053675000  |
| N  | -0.020310000 | -0.142353000 | 0.210089000  |
| C  | -1.926051000 | 0.578880000  | 1.574665000  |
| Cu | 0.476920000  | 0.660012000  | -1.687688000 |
| I  | -1.579161000 | 0.983050000  | -3.014895000 |
| C  | 2.382132000  | 0.728283000  | -1.498633000 |
| H  | -0.621302000 | -0.996673000 | 0.073959000  |
| C  | 3.613572000  | 0.778574000  | -1.379343000 |
| C  | 5.055783000  | 0.852148000  | -1.280130000 |
| H  | 5.528485000  | -0.080230000 | -1.610648000 |
| H  | 5.449197000  | 1.665719000  | -1.900604000 |
| H  | 5.371023000  | 1.039737000  | -0.246834000 |
| Cu | 1.930989000  | -0.448770000 | 0.112389000  |
| C  | 0.200494000  | 1.906178000  | 1.377789000  |
| H  | -2.650419000 | 0.591191000  | 0.749648000  |
| H  | -2.015579000 | -0.397264000 | 2.066839000  |
| I  | 3.048686000  | -1.867056000 | 1.821567000  |
| H  | -2.209687000 | 1.354671000  | 2.290137000  |
| H  | 1.199684000  | 2.049962000  | 0.965043000  |
| H  | -0.188448000 | 2.666595000  | 2.048309000  |
| N  | -1.379189000 | -2.678508000 | -0.167043000 |
| C  | -0.653307000 | -3.539063000 | 0.780738000  |
| C  | -1.089922000 | -3.056308000 | -1.559964000 |
| C  | -2.824593000 | -2.710265000 | 0.103106000  |
| C  | -0.748571000 | -3.091246000 | 2.224341000  |
| C  | 0.367187000  | -2.922624000 | -1.956939000 |
| C  | -3.651530000 | -1.841280000 | -0.822306000 |
| H  | 0.402622000  | -3.533448000 | 0.488250000  |
| H  | -1.007888000 | -4.583809000 | 0.677157000  |
| H  | -1.686816000 | -2.399777000 | -2.202302000 |
| H  | -1.438177000 | -4.091646000 | -1.747066000 |
| H  | -2.967648000 | -2.374604000 | 1.136579000  |
| H  | -3.184420000 | -3.758244000 | 0.064153000  |
| H  | -0.090641000 | -3.712072000 | 2.841698000  |
| H  | -1.759128000 | -3.173369000 | 2.639160000  |



|   |              |              |              |
|---|--------------|--------------|--------------|
| H | -0.407318000 | -2.053251000 | 2.337562000  |
| H | 0.464984000  | -3.048913000 | -3.040472000 |
| H | 1.021597000  | -3.659686000 | -1.479380000 |
| H | 0.759933000  | -1.921402000 | -1.716190000 |
| H | -4.653033000 | -1.700638000 | -0.402076000 |
| H | -3.773366000 | -2.277501000 | -1.819337000 |
| H | -3.195398000 | -0.850701000 | -0.951868000 |

**P2-10t**

E= -703.833344 a.u.

ZPE\_G= 0.077045 a.u.

G= -703.910389 a.u.

|    |              |              |              |
|----|--------------|--------------|--------------|
| C  | 0.056376000  | -1.964407000 | 1.208834000  |
| N  | 0.027254000  | -1.220698000 | 0.061920000  |
| C  | 0.135469000  | -3.449836000 | 1.074715000  |
| Cu | -1.258641000 | 0.335135000  | -0.037272000 |
| I  | -3.606122000 | -0.292380000 | -0.487259000 |
| C  | -0.016457000 | 1.825979000  | 0.353533000  |
| H  | 0.051173000  | -1.793564000 | -0.782675000 |
| C  | -0.127110000 | 3.007256000  | 0.697035000  |
| C  | -0.253522000 | 4.391565000  | 1.089509000  |
| H  | 0.619805000  | 4.970512000  | 0.766045000  |
| H  | -1.137359000 | 4.850831000  | 0.630938000  |
| H  | -0.343539000 | 4.498803000  | 2.176635000  |
| Cu | 1.269691000  | 0.391316000  | -0.031412000 |
| C  | 0.016775000  | -1.326393000 | 2.424508000  |
| H  | -0.726824000 | -3.834071000 | 0.516250000  |
| H  | 1.036699000  | -3.738367000 | 0.519971000  |
| I  | 3.624226000  | -0.204140000 | -0.479686000 |
| H  | 0.160070000  | -3.938885000 | 2.051036000  |
| H  | -0.038130000 | -0.238992000 | 2.486365000  |
| H  | 0.038180000  | -1.887915000 | 3.353118000  |

**P2-11t (Cy6)**

E= -908.0928169 a.u.

ZPE\_G= 0.127410 a.u.

G= -907.965407 a.u.

|    |              |             |              |
|----|--------------|-------------|--------------|
| Cu | -1.427943000 | 0.529671000 | -0.040586000 |
|----|--------------|-------------|--------------|

|    |              |              |              |
|----|--------------|--------------|--------------|
| C  | 0.102968000  | 1.719730000  | -0.034813000 |
| C  | 0.496052000  | 2.899012000  | -0.009335000 |
| Cu | 0.955354000  | -0.026986000 | -0.152347000 |
| C  | 0.990303000  | 4.252025000  | 0.009936000  |
| H  | 0.511753000  | 4.868390000  | -0.760489000 |
| H  | 0.838373000  | 4.732044000  | 0.983715000  |
| H  | 2.069570000  | 4.251064000  | -0.196409000 |
| N  | -2.449746000 | 4.070348000  | 0.595386000  |
| N  | -2.838866000 | 3.000380000  | 0.471075000  |
| N  | -3.095600000 | 1.796483000  | 0.311681000  |
| C  | -4.523984000 | 1.431690000  | 0.395063000  |
| H  | -5.104488000 | 1.968988000  | -0.360569000 |
| H  | -4.570347000 | 0.358857000  | 0.200626000  |
| H  | -4.917542000 | 1.642368000  | 1.393886000  |
| C  | 1.436279000  | -2.829223000 | 0.683544000  |
| N  | 1.037788000  | -1.950511000 | -0.227103000 |
| C  | 2.005136000  | -2.364698000 | 1.874836000  |
| C  | 1.243239000  | -4.294838000 | 0.440173000  |
| H  | 1.854273000  | -4.901560000 | 1.113087000  |
| H  | 0.192013000  | -4.563555000 | 0.605250000  |
| H  | 1.489666000  | -4.562721000 | -0.592364000 |
| H  | 2.114398000  | -1.296634000 | 2.053863000  |
| H  | 2.352966000  | -3.055162000 | 2.637777000  |
| I  | 3.535759000  | 0.526198000  | -0.208427000 |
| I  | -2.456757000 | -1.751308000 | -0.332175000 |
| H  | 0.612348000  | -2.388208000 | -1.045087000 |

**P2-TS5t (Cy6-TS1t)**

E= -908.0738819 a.u.

ZPE\_G= 0.1254836 a.u.

G= -907.948398 a.u.

|    |              |              |              |
|----|--------------|--------------|--------------|
| Cu | 1.645140000  | 0.330319000  | -0.139921000 |
| C  | 0.260004000  | 1.550210000  | 0.412823000  |
| C  | 0.225539000  | 2.773039000  | 0.739601000  |
| Cu | -0.781944000 | -0.096825000 | 0.300269000  |
| C  | -0.502241000 | 4.004324000  | 1.043390000  |
| H  | -0.230611000 | 4.804910000  | 0.346226000  |
| H  | -0.273587000 | 4.362172000  | 2.053550000  |

|   |              |              |              |
|---|--------------|--------------|--------------|
| H | -1.580150000 | 3.823854000  | 0.963533000  |
| N | 2.059715000  | 3.420834000  | 0.990218000  |
| N | 2.954884000  | 2.679562000  | 0.738107000  |
| N | 3.154543000  | 1.492762000  | 0.316513000  |
| C | 4.548339000  | 1.051077000  | 0.230654000  |
| H | 5.137418000  | 1.717480000  | -0.408032000 |
| H | 4.540663000  | 0.054792000  | -0.215737000 |
| H | 5.009026000  | 0.990292000  | 1.222705000  |
| C | -1.257759000 | -2.591246000 | 1.808941000  |
| N | -1.673274000 | -1.716444000 | 0.912979000  |
| C | -0.001067000 | -2.395432000 | 2.418722000  |
| C | -2.082645000 | -3.782003000 | 2.185114000  |
| H | -2.304760000 | -3.775101000 | 3.257815000  |
| H | -1.529122000 | -4.705423000 | 1.980134000  |
| H | -3.026819000 | -3.817650000 | 1.635734000  |
| H | 0.607310000  | -1.527528000 | 2.168109000  |
| H | 0.384064000  | -3.099502000 | 3.150958000  |
| I | -2.924655000 | 1.070087000  | -0.698947000 |
| I | 1.343844000  | -1.967629000 | -1.055466000 |
| H | -2.599479000 | -1.919895000 | 0.536921000  |

## P2-12t

E= -908.0924101 a.u.

ZPE\_G= 0.131818 a.u.

G=-907.960592 a.u.

|    |              |              |              |
|----|--------------|--------------|--------------|
| Cu | -1.471894000 | 0.665596000  | -0.091515000 |
| C  | 0.101381000  | 1.495364000  | 0.552898000  |
| C  | 0.300071000  | 2.793270000  | 0.798393000  |
| Cu | 0.781313000  | -0.258554000 | 0.490628000  |
| C  | 1.635819000  | 3.431869000  | 1.019540000  |
| H  | 2.004174000  | 3.862497000  | 0.080486000  |
| H  | 1.533421000  | 4.243842000  | 1.746864000  |
| H  | 2.377548000  | 2.709084000  | 1.367417000  |
| N  | -0.752362000 | 3.740246000  | 0.927018000  |
| N  | -1.976037000 | 3.425962000  | 0.760473000  |
| N  | -2.406007000 | 2.272837000  | 0.383411000  |
| C  | -3.861440000 | 2.111299000  | 0.413061000  |
| H  | -4.339336000 | 3.083141000  | 0.560310000  |

|   |              |              |              |
|---|--------------|--------------|--------------|
| H | -4.195177000 | 1.670144000  | -0.530771000 |
| H | -4.143826000 | 1.440288000  | 1.232350000  |
| C | 0.425990000  | -2.843550000 | 1.887999000  |
| N | 1.146703000  | -2.074337000 | 1.094773000  |
| C | -0.782971000 | -2.338432000 | 2.412844000  |
| C | 0.851746000  | -4.235215000 | 2.234823000  |
| H | 0.899787000  | -4.366293000 | 3.321168000  |
| H | 0.118762000  | -4.958535000 | 1.859403000  |
| H | 1.827998000  | -4.483581000 | 1.810619000  |
| H | -1.103250000 | -1.322241000 | 2.185303000  |
| H | -1.414709000 | -2.946111000 | 3.054420000  |
| I | 2.943055000  | 0.353609000  | -0.812570000 |
| I | -1.804430000 | -1.528253000 | -1.208360000 |
| H | 2.004728000  | -2.520896000 | 0.770384000  |

## P2-TS6t

E= -908.0874317 a.u.

ZPE\_G= 0.132329 a.u.

G= -907.955103 a.u.

|    |               |              |              |
|----|---------------|--------------|--------------|
| Cu | -9.080721000  | -6.397088000 | 0.038348000  |
| C  | -10.899411000 | -5.767956000 | -0.167897000 |
| C  | -11.774609000 | -6.374470000 | -0.992832000 |
| Cu | -10.496069000 | -4.732206000 | 1.347841000  |
| C  | -13.174820000 | -6.747101000 | -0.619400000 |
| H  | -13.735989000 | -6.981773000 | -1.529022000 |
| H  | -13.182521000 | -7.627741000 | 0.032680000  |
| H  | -13.673699000 | -5.939394000 | -0.076362000 |
| N  | -11.450551000 | -6.673335000 | -2.326941000 |
| N  | -10.283263000 | -6.301430000 | -2.703874000 |
| N  | -9.432556000  | -5.856574000 | -1.837900000 |
| C  | -8.310113000  | -5.077501000 | -2.366382000 |
| H  | -8.484353000  | -4.010976000 | -2.187001000 |
| H  | -7.379470000  | -5.377364000 | -1.874565000 |
| H  | -8.229848000  | -5.249574000 | -3.443060000 |
| C  | -8.404735000  | -2.975289000 | 2.504450000  |
| N  | -9.629922000  | -3.464399000 | 2.531553000  |
| C  | -7.595555000  | -3.212325000 | 1.373333000  |
| C  | -7.850867000  | -2.188666000 | 3.649893000  |

|   |               |              |             |
|---|---------------|--------------|-------------|
| H | -8.613251000  | -1.963705000 | 4.400226000 |
| H | -7.049704000  | -2.757406000 | 4.137243000 |
| H | -7.409026000  | -1.248499000 | 3.304286000 |
| H | -7.997720000  | -3.737276000 | 0.508842000 |
| H | -6.567645000  | -2.863737000 | 1.330100000 |
| I | -12.478517000 | -5.447572000 | 2.886552000 |
| I | -7.454229000  | -6.897024000 | 1.814145000 |
| H | -10.136952000 | -3.224580000 | 3.383806000 |

**P2-13t (Cy5-1t)**

E= -908.167058 au

ZPE\_G= 0.134686 au

G= -908.032372 au

|    |              |              |              |
|----|--------------|--------------|--------------|
| Cu | -1.237334000 | -0.936576000 | 0.004517000  |
| C  | 0.648704000  | -1.499705000 | 0.115236000  |
| C  | 1.220948000  | -2.344701000 | -0.870851000 |
| Cu | 0.715769000  | 0.480884000  | -0.118713000 |
| C  | 1.091322000  | -2.248265000 | -2.342579000 |
| H  | 0.891788000  | -3.228764000 | -2.787259000 |
| H  | 0.288580000  | -1.561765000 | -2.629666000 |
| H  | 2.024638000  | -1.878383000 | -2.785731000 |
| N  | 1.983216000  | -3.289130000 | -0.280107000 |
| N  | 1.943657000  | -3.102092000 | 1.030878000  |
| N  | 1.159388000  | -2.057383000 | 1.275597000  |
| C  | 0.970554000  | -1.601873000 | 2.638270000  |
| H  | 1.415268000  | -0.609092000 | 2.764170000  |
| H  | -0.096885000 | -1.556002000 | 2.871560000  |
| H  | 1.464400000  | -2.311320000 | 3.303189000  |
| C  | -0.994474000 | 2.815803000  | 0.338340000  |
| N  | -0.026318000 | 2.253537000  | -0.357100000 |
| C  | -1.450376000 | 2.180452000  | 1.514560000  |
| C  | -1.619676000 | 4.105494000  | -0.088246000 |
| H  | -1.195557000 | 4.479158000  | -1.023737000 |
| H  | -2.699307000 | 3.972461000  | -0.224657000 |
| H  | -1.488890000 | 4.871418000  | 0.684163000  |
| H  | -0.965806000 | 1.276972000  | 1.882623000  |
| H  | -2.274118000 | 2.589513000  | 2.092600000  |
| I  | 3.258141000  | 1.009275000  | -0.165137000 |

|   |              |              |              |
|---|--------------|--------------|--------------|
| I | -3.581094000 | -0.267718000 | -0.196605000 |
| H | 0.256147000  | 2.790564000  | -1.176513000 |

**P2-TS7t (Cy5-TS1t)**

E= -908.144483 au

ZPE\_G= 0.135022 au

G= -908.009461 au

|    |               |              |              |
|----|---------------|--------------|--------------|
| Cu | -8.831667000  | -7.250432000 | -0.720684000 |
| C  | -10.512039000 | -5.242977000 | -0.855387000 |
| C  | -10.812167000 | -6.616060000 | -0.695491000 |
| Cu | -10.277283000 | -3.907794000 | 0.469859000  |
| C  | -11.426318000 | -7.307572000 | 0.476200000  |
| H  | -11.319594000 | -8.393356000 | 0.394492000  |
| H  | -10.978292000 | -6.984701000 | 1.422201000  |
| H  | -12.499099000 | -7.080634000 | 0.528201000  |
| N  | -10.705246000 | -7.237952000 | -1.938263000 |
| N  | -10.408983000 | -6.323029000 | -2.843234000 |
| N  | -10.325396000 | -5.136043000 | -2.196779000 |
| C  | -9.984731000  | -3.944554000 | -2.948326000 |
| H  | -10.731583000 | -3.169011000 | -2.758781000 |
| H  | -8.996816000  | -3.582939000 | -2.649028000 |
| H  | -9.977347000  | -4.204045000 | -4.007390000 |
| C  | -8.596300000  | -3.331484000 | 2.782589000  |
| N  | -9.471123000  | -2.892313000 | 1.894220000  |
| C  | -8.188132000  | -4.680930000 | 2.725168000  |
| C  | -8.046231000  | -2.438327000 | 3.848315000  |
| H  | -8.394585000  | -2.768516000 | 4.833840000  |
| H  | -6.952506000  | -2.485511000 | 3.866293000  |
| H  | -8.349322000  | -1.397516000 | 3.708309000  |
| H  | -8.581749000  | -5.357197000 | 1.964807000  |
| H  | -7.468786000  | -5.082777000 | 3.432843000  |
| I  | -12.677619000 | -2.844209000 | 0.307415000  |
| I  | -6.544144000  | -7.523914000 | 0.055438000  |
| H  | -9.719055000  | -1.911171000 | 2.021226000  |

**P2-14t (Cy5-2t)**

E= -908.1658604 au

ZPE\_G= 0.132827 au

G= -908.033033 au

|    |              |              |              |
|----|--------------|--------------|--------------|
| Cu | -3.255636000 | -0.003606000 | 0.195840000  |
| C  | 0.816473000  | -0.016638000 | 0.608318000  |
| C  | -0.346671000 | 0.380695000  | -0.048980000 |
| Cu | 2.629434000  | 0.444627000  | 0.271608000  |
| C  | -0.515408000 | 1.265409000  | -1.226821000 |
| H  | -1.101406000 | 2.159853000  | -0.980828000 |
| H  | 0.457688000  | 1.593798000  | -1.605476000 |
| H  | -1.037054000 | 0.752108000  | -2.043535000 |
| N  | -1.410144000 | -0.183507000 | 0.589812000  |
| N  | -0.994177000 | -0.931374000 | 1.602944000  |
| N  | 0.338834000  | -0.830630000 | 1.594264000  |
| C  | 1.101563000  | -1.545982000 | 2.597220000  |
| H  | 0.406833000  | -2.134752000 | 3.197136000  |
| H  | 1.822850000  | -2.205017000 | 2.105010000  |
| H  | 1.634620000  | -0.836870000 | 3.236492000  |
| C  | 4.483295000  | 2.722515000  | 0.056319000  |
| N  | 4.292498000  | 1.416243000  | 0.095274000  |
| C  | 3.365074000  | 3.578207000  | 0.151584000  |
| C  | 5.849544000  | 3.311816000  | -0.095627000 |
| H  | 6.630528000  | 2.547303000  | -0.088143000 |
| H  | 5.919660000  | 3.868095000  | -1.037220000 |
| H  | 6.052207000  | 4.025735000  | 0.709675000  |
| H  | 2.357704000  | 3.175223000  | 0.253387000  |
| H  | 3.481844000  | 4.657635000  | 0.125669000  |
| I  | 3.393175000  | -1.874617000 | -0.728824000 |
| I  | -5.614568000 | 0.256798000  | -0.344071000 |
| H  | 5.155932000  | 0.880433000  | 0.007132000  |

### **P2-mono14t**

E= -700.4817542 au

ZPE\_G= 0.138008 au

G= -700.343746 au

|    |              |              |              |
|----|--------------|--------------|--------------|
| C  | 1.366296000  | -0.914453000 | 0.120657000  |
| C  | 1.993920000  | -1.711025000 | -0.848252000 |
| Cu | -0.433948000 | -0.344147000 | 0.229864000  |
| C  | 1.408257000  | -2.309853000 | -2.074911000 |
| H  | 1.240103000  | -3.389008000 | -1.961839000 |

|   |              |              |              |
|---|--------------|--------------|--------------|
| H | 0.442180000  | -1.850728000 | -2.313957000 |
| H | 2.070922000  | -2.178449000 | -2.937483000 |
| N | 3.288606000  | -1.918893000 | -0.491788000 |
| N | 3.530420000  | -1.278659000 | 0.634391000  |
| N | 2.380878000  | -0.666204000 | 0.994199000  |
| C | 2.339764000  | 0.120045000  | 2.207487000  |
| H | 3.343531000  | 0.134875000  | 2.635510000  |
| H | 2.019680000  | 1.141477000  | 1.978199000  |
| H | 1.641725000  | -0.322768000 | 2.924641000  |
| C | -3.179851000 | -1.391105000 | 0.281058000  |
| N | -2.362893000 | -0.360687000 | 0.409202000  |
| C | -2.630583000 | -2.660645000 | 0.005146000  |
| C | -4.662530000 | -1.242637000 | 0.413208000  |
| H | -4.951559000 | -0.222774000 | 0.679491000  |
| H | -5.156124000 | -1.506520000 | -0.528920000 |
| H | -5.051004000 | -1.925638000 | 1.176218000  |
| H | -1.552668000 | -2.792660000 | -0.089921000 |
| H | -3.265426000 | -3.534109000 | -0.111940000 |
| I | -0.056982000 | 2.191305000  | -0.380444000 |
| H | -2.847548000 | 0.516516000  | 0.599079000  |

## P2-15t

E= -908.166404 au

ZPE\_G= 0.133722 au

G= -908.032682 au

|    |              |              |              |
|----|--------------|--------------|--------------|
| Cu | -3.135186000 | -0.444655000 | 0.051098000  |
| C  | 0.943239000  | -0.246641000 | 0.150649000  |
| C  | -0.290768000 | 0.192167000  | -0.315711000 |
| Cu | 2.746733000  | 0.423530000  | -0.191720000 |
| C  | -0.636798000 | 1.287842000  | -1.254854000 |
| H  | 0.245924000  | 1.624944000  | -1.805521000 |
| H  | -1.387498000 | 0.962862000  | -1.984833000 |
| H  | -1.054389000 | 2.156059000  | -0.726913000 |
| N  | -1.256382000 | -0.579591000 | 0.263119000  |
| N  | -0.711793000 | -1.474261000 | 1.073338000  |
| N  | 0.609280000  | -1.261152000 | 0.996667000  |
| C  | 1.494909000  | -2.099076000 | 1.780108000  |
| H  | 0.880821000  | -2.740513000 | 2.413178000  |



|   |              |              |              |
|---|--------------|--------------|--------------|
| H | 2.114323000  | -2.710392000 | 1.118030000  |
| H | 2.142843000  | -1.473547000 | 2.400337000  |
| C | 1.796484000  | 3.154139000  | 0.548782000  |
| N | 2.427795000  | 2.354588000  | -0.289730000 |
| C | 1.291467000  | 2.632319000  | 1.758128000  |
| C | 1.586743000  | 4.602126000  | 0.232155000  |
| H | 1.893436000  | 5.236176000  | 1.070027000  |
| H | 2.134494000  | 4.912228000  | -0.661441000 |
| H | 0.519826000  | 4.792104000  | 0.062177000  |
| H | 1.453868000  | 1.591046000  | 2.026835000  |
| H | 0.743815000  | 3.266522000  | 2.449526000  |
| I | 4.677235000  | -1.115793000 | -0.392906000 |
| I | -5.541203000 | -0.209837000 | -0.227170000 |
| H | 2.773966000  | 2.839181000  | -1.118571000 |

## P2-15s

E= -908.411308 au

ZPE\_G= 0.137878 au

G= -908.027343 au

|    |              |              |              |
|----|--------------|--------------|--------------|
| C  | -2.714601000 | -3.058862000 | -0.278294000 |
| N  | -2.517507000 | -2.029375000 | -1.167533000 |
| C  | -3.912747000 | -3.115189000 | 0.375651000  |
| C  | -1.622350000 | -4.057844000 | -0.067693000 |
| H  | -1.938861000 | -4.883611000 | 0.574461000  |
| H  | -1.285465000 | -4.475893000 | -1.023649000 |
| H  | -0.750044000 | -3.576756000 | 0.395701000  |
| H  | -4.696522000 | -2.389705000 | 0.164670000  |
| H  | -4.120080000 | -3.887936000 | 1.110194000  |
| H  | -1.635745000 | -2.153988000 | -1.671657000 |
| Cu | 3.082476000  | 0.142524000  | 0.214938000  |
| C  | -0.970662000 | -0.187035000 | 0.102283000  |
| C  | 0.250960000  | -0.034469000 | -0.531509000 |
| C  | 0.582919000  | 0.083312000  | -1.971397000 |
| H  | 1.312051000  | 0.882256000  | -2.147674000 |
| H  | 1.019282000  | -0.845254000 | -2.361118000 |
| H  | -0.309967000 | 0.309554000  | -2.562079000 |
| N  | 1.205251000  | -0.011498000 | 0.445229000  |
| N  | 0.656491000  | -0.155686000 | 1.642666000  |

|    |              |              |              |
|----|--------------|--------------|--------------|
| N  | -0.659853000 | -0.272606000 | 1.421021000  |
| C  | -1.560428000 | -0.442659000 | 2.543651000  |
| H  | -0.966799000 | -0.416295000 | 3.457717000  |
| H  | -2.296196000 | 0.366822000  | 2.550313000  |
| H  | -2.076373000 | -1.405114000 | 2.467266000  |
| I  | 5.484062000  | 0.290536000  | -0.130682000 |
| Cu | -2.771691000 | -0.292770000 | -0.565018000 |
| I  | -4.019481000 | 1.765948000  | -0.024556000 |

## P2-TS8s

E= -908.156751 au

ZPE\_G= 0.139703 au

G= -908.017048 au

|    |              |              |              |
|----|--------------|--------------|--------------|
| Cu | -2.909557000 | 0.171946000  | 0.265505000  |
| C  | 1.149578000  | 0.388467000  | 0.011007000  |
| C  | -0.098653000 | 0.266131000  | -0.589023000 |
| Cu | 2.984407000  | -0.089646000 | -0.547834000 |
| C  | -0.468191000 | 0.191468000  | -2.020348000 |
| H  | 0.310697000  | -0.305096000 | -2.607616000 |
| H  | -1.401020000 | -0.367417000 | -2.151393000 |
| H  | -0.630008000 | 1.190339000  | -2.448646000 |
| N  | -1.015234000 | 0.241426000  | 0.416097000  |
| N  | -0.423373000 | 0.366280000  | 1.597277000  |
| N  | 0.884396000  | 0.490978000  | 1.343000000  |
| C  | 1.823979000  | 0.528433000  | 2.447210000  |
| H  | 1.258407000  | 0.714410000  | 3.360402000  |
| H  | 2.348677000  | -0.429393000 | 2.518648000  |
| H  | 2.546691000  | 1.333794000  | 2.286485000  |
| C  | 2.478868000  | 2.818785000  | -0.120931000 |
| N  | 2.439573000  | 1.670122000  | -0.924312000 |
| C  | 3.564942000  | 3.030025000  | 0.650403000  |
| C  | 1.303882000  | 3.739082000  | -0.190633000 |
| H  | 1.454871000  | 4.631301000  | 0.422163000  |
| H  | 1.115594000  | 4.063865000  | -1.221850000 |
| H  | 0.390863000  | 3.235166000  | 0.156784000  |
| H  | 4.399523000  | 2.331325000  | 0.654729000  |
| H  | 3.639069000  | 3.911673000  | 1.280454000  |
| I  | 4.138323000  | -2.211507000 | -0.203290000 |

|   |              |             |              |
|---|--------------|-------------|--------------|
| I | -5.323560000 | 0.144361000 | 0.001621000  |
| H | 1.752365000  | 1.770654000 | -1.671077000 |

### P2-16t

E= -908.1203583 au

ZPE\_G= 0.136001 au

G= -907.984357 au

|    |             |              |             |
|----|-------------|--------------|-------------|
| N  | 4.121284000 | 7.715303000  | 2.984378000 |
| N  | 3.356409000 | 6.606892000  | 2.892938000 |
| N  | 5.971427000 | 8.306774000  | 4.453310000 |
| C  | 4.569042000 | 7.961006000  | 4.343660000 |
| C  | 7.038427000 | 7.473094000  | 4.648902000 |
| C  | 4.092788000 | 6.733730000  | 4.986961000 |
| N  | 3.370857000 | 6.036885000  | 4.112152000 |
| C  | 6.963228000 | 6.117361000  | 4.461939000 |
| H  | 6.070968000 | 5.618290000  | 4.097275000 |
| H  | 7.839367000 | 5.505196000  | 4.651440000 |
| H  | 6.188600000 | 9.297293000  | 4.422935000 |
| C  | 4.243787000 | 6.358948000  | 6.410043000 |
| H  | 4.191608000 | 5.272271000  | 6.538453000 |
| H  | 5.203119000 | 6.706236000  | 6.810060000 |
| H  | 3.452856000 | 6.804681000  | 7.030372000 |
| C  | 4.035787000 | 8.718438000  | 1.956316000 |
| H  | 3.327812000 | 9.510203000  | 2.244408000 |
| H  | 5.020541000 | 9.165229000  | 1.789657000 |
| H  | 3.696188000 | 8.243541000  | 1.034312000 |
| C  | 8.303484000 | 8.150447000  | 5.063362000 |
| H  | 9.138300000 | 7.447233000  | 5.078168000 |
| H  | 8.558082000 | 8.968243000  | 4.378576000 |
| H  | 8.201228000 | 8.586578000  | 6.064166000 |
| Cu | 3.562415000 | 9.423582000  | 5.248003000 |
| I  | 1.925585000 | 11.023124000 | 6.136377000 |
| Cu | 2.386308000 | 4.430744000  | 4.370560000 |
| I  | 1.248521000 | 2.320491000  | 4.749915000 |

### P2-16s

E= -908.121775 au HF=-908.3175027 au

ZPE\_G= 0.133766 au

G= -907.988009 au

|    |             |             |             |
|----|-------------|-------------|-------------|
| Cu | -3.02814500 | 0.05040700  | 0.23985400  |
| C  | 0.72424800  | 1.58182200  | 0.37992000  |
| C  | -0.24859700 | 0.84852800  | -0.27016300 |
| C  | -0.20562800 | 0.15731500  | -1.57752100 |
| H  | 0.74503500  | -0.37642600 | -1.70914100 |
| H  | -1.01932500 | -0.57256600 | -1.64775500 |
| H  | -0.30510000 | 0.85906100  | -2.41473200 |
| N  | -1.33238400 | 0.85377100  | 0.55266200  |
| N  | -1.08743900 | 1.52866900  | 1.66340500  |
| N  | 0.16815100  | 1.98454400  | 1.54808000  |
| C  | 0.76346500  | 2.74739000  | 2.62786500  |
| H  | 0.00324300  | 2.86052400  | 3.40025300  |
| H  | 1.62293800  | 2.21226200  | 3.04118000  |
| H  | 1.06629400  | 3.73626900  | 2.27293000  |
| C  | 2.11184900  | 2.58463900  | -1.33278400 |
| N  | 2.05394600  | 1.87381500  | -0.03050500 |
| C  | 2.82204500  | 2.04338300  | -2.31885800 |
| C  | 1.35230600  | 3.86322000  | -1.39087900 |
| H  | 0.28303500  | 3.70636700  | -1.19456200 |
| H  | 1.71225000  | 4.57908700  | -0.63958400 |
| H  | 1.44952600  | 4.32600800  | -2.37566600 |
| H  | 3.34637100  | 1.09492900  | -2.20115100 |
| H  | 2.89855700  | 2.54219000  | -3.28126100 |
| I  | -5.17721000 | -0.97762700 | -0.23793700 |
| H  | 2.50343700  | 2.46692900  | 0.67291600  |
| Cu | 3.02345000  | 0.13227500  | 0.04306800  |
| I  | 4.10732000  | -2.02946300 | 0.14418000  |

### Other Complex

#### CuI

E= -207.6138135 au

ZPE\_G= -0.024748 au

G= -207.638562 au

|    |             |             |              |
|----|-------------|-------------|--------------|
| Cu | 0.000000000 | 0.000000000 | -1.556267000 |
| I  | 0.000000000 | 0.000000000 | 0.851542000  |

**Et<sub>3</sub>N**

E= -292.3619923 au

ZPE\_G= 0.172210 au

G= -292.189782 au

|   |              |              |              |
|---|--------------|--------------|--------------|
| N | -0.000523000 | 0.000561000  | -0.068290000 |
| C | 0.077113000  | -1.387144000 | 0.395509000  |
| C | -1.241227000 | 0.626012000  | 0.396543000  |
| C | 1.161073000  | 0.761658000  | 0.398873000  |
| C | 1.078368000  | -2.224801000 | -0.375621000 |
| C | -2.467155000 | 0.180681000  | -0.376522000 |
| C | 1.392087000  | 2.043358000  | -0.377167000 |
| H | -0.917383000 | -1.834403000 | 0.280529000  |
| H | 0.302983000  | -1.419039000 | 1.483411000  |
| H | -1.130877000 | 1.711281000  | 0.285228000  |
| H | -1.382210000 | 0.442722000  | 1.483816000  |
| H | 2.045336000  | 0.122142000  | 0.292164000  |
| H | 1.069499000  | 0.978175000  | 1.485216000  |
| H | 1.072622000  | -3.258344000 | -0.010570000 |
| H | 2.104591000  | -1.852126000 | -0.275739000 |
| H | 0.830687000  | -2.238626000 | -1.443366000 |
| H | -3.359650000 | 0.699848000  | -0.008481000 |
| H | -2.656519000 | -0.895050000 | -0.282236000 |
| H | -2.355929000 | 0.407702000  | -1.443227000 |
| H | 2.286682000  | 2.557495000  | -0.007207000 |
| H | 0.555143000  | 2.746005000  | -0.288644000 |
| H | 1.537142000  | 1.829702000  | -1.442552000 |

**Et<sub>3</sub>NH**

E= -292.8135098

ZPE\_G= 0.188747 au

G= -292.624763 au

|   |              |              |              |
|---|--------------|--------------|--------------|
| N | -0.000729000 | -0.000508000 | -0.013907000 |
| C | 0.382032000  | -1.392493000 | 0.438063000  |
| C | -1.397581000 | 0.364961000  | 0.438556000  |
| C | 1.013055000  | 1.026526000  | 0.441088000  |
| C | 1.497742000  | -1.979407000 | -0.388834000 |
| C | -2.465721000 | -0.303735000 | -0.389199000 |
| C | 0.970897000  | 2.283857000  | -0.389891000 |

|   |              |              |              |
|---|--------------|--------------|--------------|
| H | -0.521847000 | -2.002567000 | 0.368043000  |
| H | 0.644336000  | -1.295910000 | 1.496180000  |
| H | -1.471799000 | 1.453263000  | 0.371003000  |
| H | -1.446623000 | 0.087136000  | 1.496387000  |
| H | 1.993298000  | 0.547347000  | 0.379530000  |
| H | 0.793189000  | 1.210707000  | 1.497552000  |
| H | 1.722097000  | -2.981997000 | -0.014600000 |
| H | 2.422844000  | -1.397590000 | -0.331077000 |
| H | 1.211684000  | -2.077485000 | -1.441533000 |
| H | -3.444876000 | 0.007375000  | -0.015026000 |
| H | -2.429427000 | -1.395981000 | -0.332596000 |
| H | -2.406537000 | -0.005687000 | -1.441696000 |
| H | 1.727700000  | 2.978108000  | -0.014748000 |
| H | 0.005589000  | 2.797182000  | -0.338082000 |
| H | 1.203027000  | 2.081644000  | -1.441227000 |
| H | -0.000099000 | -0.000241000 | -1.039462000 |

### **N<sub>3</sub>Me**

E= -204.0877889 au

ZPE\_G= 0.024116 au

G= -204.063673 au

|   |              |              |              |
|---|--------------|--------------|--------------|
| N | -1.807096000 | 0.264453000  | 0.000004000  |
| N | -0.713263000 | -0.091197000 | 0.000008000  |
| N | 0.394244000  | -0.624762000 | -0.000015000 |
| C | 1.552901000  | 0.281125000  | -0.000010000 |
| H | 1.564797000  | 0.911786000  | 0.895827000  |
| H | 2.438497000  | -0.353664000 | -0.002633000 |
| H | 1.562108000  | 0.915661000  | -0.893112000 |

### **Acetylene**

E= -116.6367348 au

ZPE\_G= 0.031374 au

G= -116.605361 au

|   |              |              |              |
|---|--------------|--------------|--------------|
| C | -1.425482000 | 0.000032000  | -0.000052000 |
| H | -2.495193000 | 0.000057000  | -0.000338000 |
| C | -0.212963000 | -0.000107000 | 0.000272000  |
| C | 1.236778000  | 0.000010000  | -0.000036000 |
| H | 1.635457000  | -0.851440000 | 0.563290000  |

|   |             |              |              |
|---|-------------|--------------|--------------|
| H | 1.634707000 | -0.062211000 | -1.019408000 |
| H | 1.635032000 | 0.913984000  | 0.455358000  |

### **B1s**

E= -380.052369 au

ZPE\_G= 0.052287 au

G= -380.000082 au

|    |              |              |              |
|----|--------------|--------------|--------------|
| C  | 3.181982000  | 0.173878000  | 0.000020000  |
| C  | 2.969201000  | 1.553257000  | 0.000061000  |
| H  | 3.804054000  | 2.248889000  | -0.000045000 |
| H  | 1.963328000  | 1.969639000  | -0.000478000 |
| N  | 2.096420000  | -0.609076000 | -0.000154000 |
| C  | 4.550255000  | -0.418424000 | 0.000086000  |
| H  | 4.691704000  | -1.052703000 | 0.881853000  |
| H  | 4.692239000  | -1.051508000 | -0.882470000 |
| H  | 5.324344000  | 0.350311000  | 0.000801000  |
| Cu | 0.292785000  | -0.298453000 | -0.000005000 |
| I  | -2.079336000 | 0.079300000  | 0.000011000  |
| H  | 2.354772000  | -1.601133000 | -0.000029000 |

### **Et<sub>3</sub>N-CuI**

E= -500.044833 au

ZPE\_G= 0.166586 au

G= -499.878247 au

|   |              |              |              |
|---|--------------|--------------|--------------|
| N | -2.040261000 | -0.000240000 | -0.000158000 |
| C | -2.547540000 | 1.099863000  | -0.873237000 |
| C | -2.547471000 | 0.205075000  | 1.389259000  |
| C | -2.547069000 | -1.306267000 | -0.517134000 |
| C | -1.806809000 | 1.212880000  | -2.186784000 |
| C | -1.810538000 | 1.289439000  | 2.142860000  |
| C | -1.809577000 | -2.501142000 | 0.044254000  |
| H | -2.441914000 | 2.034714000  | -0.313439000 |
| H | -3.626547000 | 0.940494000  | -1.034627000 |
| H | -2.437385000 | -0.746359000 | 1.919516000  |
| H | -3.627420000 | 0.420166000  | 1.332555000  |
| H | -2.438011000 | -1.289208000 | -1.606315000 |
| H | -3.626867000 | -1.365139000 | -0.301920000 |
| H | -2.221549000 | 2.036568000  | -2.777506000 |

|    |              |              |              |
|----|--------------|--------------|--------------|
| H  | -1.878865000 | 0.305037000  | -2.795750000 |
| H  | -0.741447000 | 1.423525000  | -2.019364000 |
| H  | -2.223532000 | 1.386355000  | 3.152525000  |
| H  | -1.888660000 | 2.270718000  | 1.662076000  |
| H  | -0.743708000 | 1.044370000  | 2.238978000  |
| H  | -2.221925000 | -3.423834000 | -0.377681000 |
| H  | -1.888203000 | -2.576511000 | 1.134342000  |
| H  | -0.742679000 | -2.461112000 | -0.215634000 |
| Cu | -0.044641000 | 0.000512000  | -0.000485000 |
| I  | 2.391305000  | -0.000227000 | 0.000417000  |
